# **Muscle-derived Myoglianin regulates *Drosophila* imaginal disc growth**

Ambuj Upadhyay<sup>1</sup>, Aidan J. Peterson<sup>1</sup>, Myung-Jun Kim<sup>1</sup>, and Michael B. O'Connor <sup>1#</sup>

<sup>1</sup>Department of Genetics, Cell Biology and Development  
University of Minnesota  
Minneapolis, MN 55455

# Corresponding author

Michael B. O'Connor  
Department of Genetics, Cell Biology and Development  
6-160 Jackson Hall  
Minneapolis, MN 55455  
Tel. 612-626-0642  
Email: moconnor@umn.edu

# ABSTRACT

Organ growth and size are finely tuned by intrinsic and extrinsic signaling molecules. In *Drosophila*, the BMP family member Dpp is produced in a limited set of imaginal disc cells and functions as a classic morphogen to regulate pattern and growth by diffusing throughout imaginal discs. However, the role of TGF $\beta$ /Activin-like ligands in disc growth control remains ill-defined. Here we demonstrate that Myoglianin (Myo), an Activin family member, and a close homolog of mammalian Myostatin (Mstn), is a muscle-derived extrinsic factor that uses canonical dSmad2 mediated signaling to regulate wing size. We propose that Myo is a myokine that helps mediate an allometric relationship between muscles and their associated appendages.

## INTRODUCTION

How organ growth is regulated to achieve proper scaling with final body size has been a long standing question in developmental biology. Organ growth is a dynamic process that is finely tuned by highly conserved signaling molecules that are produced and act within the tissue of origin (intrinsic) or on a distant tissue (extrinsic) (Boulant et al., 2015; Hariharan, 2015; Johnston and Gallant, 2002; Mirth and Shingleton, 2012). These growth signals regulate final organ size through three distinct processes: cell division (proliferation), mass accumulation (cell growth) and cell death (apoptosis). The *Drosophila* wing imaginal disc, the larval precursor to adult wings and thorax, has been widely used as a model to study the molecular mechanisms that control organ growth and size control (Martin et al., 2009). Genetic analysis has identified numerous wing disc intrinsic factors, such as Wnt, Hedgehog, and Bone Morphogenetic Protein (BMP) homologs, that are required for proper patterning and proliferation (Hariharan, 2015). In contrast, examples of extrinsic factors that regulate imaginal disc growth are limited. The Insulin-like signaling pathway is one clear exception. Insulin-like peptides are produced in the brain and fat body and are well known to promote both growth and proliferation in many tissues including imaginal disc cells (Boulant et al., 2015; Droujinine and Perrimon, 2013; Grewal, 2012; Nijhout, 2003; Shingleton et al., 2007; Sopko and Perrimon, 2013; Teleman, 2009). Insulin-like factors act in a physiological capacity to coordinate overall organismal growth with nutrition. Identification of other extrinsic growth signals could provide new insights into mechanisms governing coordinated organ scaling.

The largest and most diverse group of signaling molecules is the Transforming Growth Factor  $\beta$  (TGF $\beta$ ) superfamily of growth and differentiation factors. The superfamily is divided into the BMP and the Activin/TGF $\beta$ -like subfamilies based on sequence and signaling relationships. In higher vertebrates, these growth factors play a myriad of roles during development from cell fate specification and stem cell maintenance to control of cellular growth and proliferation (Morikawa et al., 2016). Both TGF $\beta$  branches are conserved in *Drosophila*, where limited functional redundancy and a powerful genetic toolkit provide

an attractive system for study (Peterson and O'Connor, 2014; Upadhyay et al., 2017). The *Drosophila* BMP ligand Decapentaplegic (Dpp) functions as a classic intrinsic morphogen, since it is secreted from a limited number of imaginal disc source cells and then diffuses throughout the tissue to regulate proliferation and patterning based on its concentration gradient (Campbell and Tomlinson, 1999; Lecuit et al., 1996; Restrepo et al., 2014). Conversely, the Activin-like branch also plays a significant role in disc growth, however it is much less characterized (Brummel et al., 1999; Hevia and de Celis, 2013; Hevia et al., 2017).

In *Drosophila*, Activin-like signaling is initiated by the three ligands, Myoglianin (Myo), Activin $\beta$  (Act $\beta$ ), and Dawdle (Daw). These ligands bind to and activate a hetero-tetrameric receptor complex on the cell membrane consisting of two type-I receptor subunits encoded by the *baboon* (*babo*) locus and two type-II receptor subunits encoded by either the *punt* or *wishful-thinking* (*wit*) genes or perhaps a combination of the two (Upadhyay et al., 2017). Activated Babo phosphorylates cytosolic dSmad2 which then accumulates in the nucleus and, along with the co-Smad Medea, regulates expression of target genes (Brummel et al., 1999; Hevia et al., 2017).

Notably, there are three splice isoforms of *babo* with different ligand binding domains, which presumably provide ligand binding specificity (Jensen et al., 2009). *Babo* null mutants die at the larval-pupal transition and have significantly smaller wing imaginal discs and escapers, produced by hypomorphic alleles, also have smaller adult wings (Brummel et al., 1999). Conversely, expression of constitutively activated Babo in wing imaginal discs leads to larger adult wings that contain more cells, suggesting that Activin-like signaling has a role in regulating proliferation (Brummel et al., 1999; Hevia and de Celis, 2013). Additionally, Babo can signal non-canonically through Mad (the BMP Smad) to stimulate wing disc overgrowth, but only in the background of a protein null allele of *dSmad2* (Peterson and O'Connor, 2013).

For both the dSmad2 canonical and the Mad non-canonical signaling pathways, it remains unclear which Babo isoform and which Activin-like ligands, or combination thereof, regulates disc growth, nor is

it clear which tissue(s) provide the ligands that promote disc growth. Expression analysis by *in situ* hybridization or RNAseq data suggests that all Activin-like ligands are expressed in the imaginal wing disc, albeit at low levels, perhaps indicating collective contribution to stimulating tissue growth (Graveley et al., 2011; Hevia and de Celis, 2013). However it is important to recognize that mRNA expression does not necessarily correlate with secretion of functional ligand, especially since TGF $\beta$ -type ligands undergo a series of post-translational modifications and ligand processing to generate active molecules and these processes may vary within different tissues (Akiyama et al., 2012).

Here we report our analysis of Activin-like ligands and Baboon isoforms for their roles in regulating imaginal disc growth. Through a series of genetic experiments, we demonstrate that among the three *Drosophila* Activin-like ligands, only Myo is required for proper growth of imaginal discs. We also identify the receptors Babo-A and Punt as being necessary for Myo regulation of wing imaginal disc growth via phosphorylation of dSmad2. Surprisingly, we identify the tissue source of Myo that controls disc growth to be the larval muscle.

## RESULTS

### ***Myoglianin* is required for proper disc growth**

All *Drosophila* Activin-like ligands (Myo, Act $\beta$ , and Daw) have tissue specific function yet signal via the sole Type-I receptor Babo. Hence, the *babo* mutant phenotype is likely a composite of the three individual ligand mutant phenotypes. The imaginal discs of *babo* mutants are approximately 30% smaller than wild-type but do not exhibit any obvious defects in tissue patterning (Brummel et al., 1999). We set out to identify which Activin-like ligand(s) are required for proper imaginal disc growth. Null *myo*, *Act $\beta$* , and *daw* mutants are larval or pharate lethal (Awasaki et al., 2011; Ghosh and O'Connor, 2014; Zhu et al., 2008, Moss Taylor et al., 2019). Therefore, we analyzed the size of imaginal wing discs from late third instar larvae of null mutant animals. For this initial analysis, we used a simple yeast/sugar

diet (5Y5S), because *daw* mutants are sensitive to standard acidic cornmeal food (Ghosh and O'Connor, 2014). Interestingly, only *myo* mutants yield significantly smaller discs, phenocopying *babo* mutants. *Myo* wing discs are approximately 40% smaller than *yw* controls, but retain their normal shape and pattern (Figure 1, B and E). *Actβ* mutant discs had no significant size defects, while *daw* mutant discs were slightly smaller, which may be attributable to the reduction of insulin secretion in the *daw* mutants (Figure 1, C-E) (Ghosh and O'Connor, 2014). Previous studies suggested that all Activin-like ligands are expressed in the wing disc (Hevia and de Celis, 2013). Despite this observation, our result clearly suggests that only *myo* is functionally required for growth of the discs, and that other ligands may have other functions apart from disc growth. We next asked whether other imaginal tissues such as the haltere and leg discs are also affected by the loss of *myo*. Indeed, both these imaginal discs are also approximately 40-50% smaller in *myo* mutants and maintain their proportional size (Figure 1, F-I). This suggests that Myo signaling regulates tissue growth in all three of these imaginal discs to similar extents.

To determine why *myo* mutant discs are small, we measured cell size, cell growth, proliferation, and apoptosis. First, to assess cell size, we used phalloidin staining to mark the apical actin belt, and measured the cell density at the epithelium apical surface. We observed that the cells in *myo* mutants are more densely packed. We calculated that the cells in these mutants are approximately 22% smaller than controls (Figure 1, J-L). This observation is consistent with the smaller cell size report for *dSmad2* mutant discs (Peterson and O'Connor, 2013). Next, we checked for cell proliferation and cell death markers at 90-96 hours after egg lay (AEL), at time at which a large amount disc growth occurs, and because cell death pathways are blocked later in development (Jaszczak and Halme, 2016). We examined proliferation by staining for phospho-Histone 3(ser10) to mark mitotic cells, and found no significant difference between *myo* discs and controls at this stage (Figure 1, M-O). Next, we stained 90-96hr AEL discs with anti-cleaved-caspase 3, an apoptosis marker, and found no increase in apoptosis in *myo* mutants (Figure 1 Supplement 1, A-B).

Another possible explanation for why *myo* mutant discs do not grow properly could be defects in TOR pathway regulation. To address this issue, we stained growing early L3 imaginal discs for phospho-S6, which is a target of S6K and a readout of TOR pathway activation (Romero-Pozuelo et al., 2017). We found no decrease in pS6 staining in *myo* mutant discs, indicating that TOR signaling is not perturbed in these cells (Figure 1 Supplement 1, C-D). We conclude that *myo* mutant discs are smaller in part due to smaller cells. However, the 22% decrease in cell size is insufficient to completely account for the 40-50% decrease in total tissue size. Because our proliferation and apoptosis assays are snapshot experiments of fixed tissues, we infer that the portion of final disc size that cannot be accounted for by smaller cell size represents either a small proliferation reduction or a slight increase in apoptosis rate that cannot be detected at individual time points but, over the course of the entire developmental period, leads to an additional ~20% decrease in disc size. We note that a previous study of *dSmad2* mutant clones in wing discs reported smaller *dSmad2* mutant average clone size compared to control clones, consistent with a reduction in proliferation rate (Hevia et al., 2017).

*Myo* is homologous to vertebrate *Mstn*, which negatively regulates skeletal muscle size by inhibiting proliferation of muscle stem cells (Morikawa et al., 2016) and regulation of protein homeostasis (Lee et al., 2011; Rodriguez et al., 2014; Trendelenburg et al., 2009). Recent studies in *Drosophila* using RNAi tissue specific knockdown suggested that *Myo* also functions as a negative regulator of muscle size similarly to vertebrate *Mstn* (Augustin et al., 2017). We re-examined this issue using *myo* null alleles and measured the size of muscles 6 and 7, as well as the number of nuclei per fiber from the 2nd Abdominal segment. Surprisingly, *myo1* mutant muscles are 13% smaller vs heterozygote controls ( $p = 0.02$ ), however they contain the same number of nuclei per fiber, which suggests that there were no defects in myoblast fusion during embryogenesis (Figure 1, P-S). We repeated the experiment using a newly generated *myoCR2* allele and analyzed *myo1/CR2* transheterozygotes to rule out 4<sup>th</sup> chromosome background effects. In this case, we find no difference in muscle size compared to controls again indicating that *myo* mutants do not have larger muscles compared to heterozygote controls (Figure 1 Supplement 2). We also

repeated the RNAi experiments and find no statistical difference in muscle size of *mef2>myo-miRNA* vs *w1118; myo-miRNA* controls (Figure 1, Supplement 2). Additionally, ubiquitous knockdown of *myo* using *da-GAL4* does not result in larger muscles compared to the *myo* null mutants, or *myo* heterozygotes (Figure 1 Supplement 2). Taken together our results suggest that *Drosophila myo* is not functionally conserved with vertebrate *Mstn* in regulating muscle size.

### **Myo signals canonically via dSmad2**

Canonical TGF $\beta$ /Activin pathway activation in *Drosophila* is mediated by the Type-I receptor Baboon phosphorylating cytosolic dSmad2 at the C-terminus (Brummel et al., 1999; Peterson and O'Connor, 2014; Upadhyay et al., 2017). To determine if Myo acts through the canonical signaling pathway, we examined phosphorylated dSmad2 (p-dSmad2) levels by western blots of late L3 larvae wing disc extracts of *yw*, *myo* heterozygotes and null animals. In homozygous null mutants there is no signal under our detection conditions. These findings indicate that Myo is the primary ligand for TGF $\beta$ /Activin signaling in wing discs (Figure 1, T-U).

### **Myo signaling in imaginal discs requires a specific isoform of Baboon**

*Baboon* is the sole Activin branch Type I receptor in *Drosophila*, but encodes three splice isoforms (Awasaki et al., 2011; Jensen et al., 2009). The three splice isoforms are a result of mutually exclusive alternative splicing of the fourth exon (4a, 4b, 4c) giving rise to three receptors (Babo-A, Babo-B, and Babo-C) (Brummel et al., 1999; Jensen et al., 2009) that differ only in their extracellular, ligand binding domains (Figure 2, A). It has been suggested that different tissues express different isoforms, perhaps in order to tune tissue-specific responses to various ligands (Awasaki et al., 2011; Jensen et al., 2009). Ectopic Myo expression in the larval brain is lethal, however viability can be partially restored by simultaneously knocking down *babo-a* but not *babo-b* or *babo-c*, which suggests that Myo signals via Babo-A (Awasaki et al., 2011). Since only *myo* is required for proper growth of imaginal discs (Figure 1, B), we hypothesized that *babo-a* should be the major splice isoform expressed in the discs. We isolated

late L3 wing discs and performed qPCR analysis using isoform specific primers, and detected only *babo-a* expression in the discs (Figure 2, B). We verified that the primers for *babo-a*, *babo-b* and *babo-c* all amplify with similar efficiencies using known levels of control cDNA templates, and also found that each isoform shows different tissue-specific expression profiles (Figure 2 Supplement 1). For example, the brain primarily expresses *babo-a* similar to the wing disc, while the fat body and gut primarily express *babo-c* and the carcass (muscle and epidermis) shows mixed lower expression levels of all three isoforms.

Next, we functionally tested whether isoform Babo-A is required for wing growth using the GAL4/UAS system to conduct tissue and isoform-specific RNAi knockdown experiments. Using tissue specific and distinct GAL4 drivers such as: *esg* (whole disc), *ci* (anterior compartment), and *hh* (posterior compartment) GAL4 lines, we knocked down individual *babo* isoforms and measured overall tissue size and cell size/density. In support of the qPCR data, we find that knocking down *babo-a* alone with *esg-GAL4* results in 40% smaller adult wings, whereas knocking down *babo-b* or *babo-c* has no effect on wing size (Figure 2, C-F, O). We confirmed that the *babo-b* and *babo-c* RNAi constructs are active since, when expressed ubiquitously, they replicate *Actb* and *daw* mutant phenotypes respectively. Using compartments specific Gal4 lines, we find that *Ci-GAL4* driving *babo-a* RNAi reduces the anterior compartment by 50% (Figure 2, F-I, L). Next, knockdown of *babo-a* using the *hh-GAL4* is pupal lethal, thus we analyzed the late L3 imaginal wing discs. To measure the size of the posterior compartment in wing discs we co-expressed GFP. Similar to the other drivers, we observed that knocking down *babo-a* in the posterior compartment reduced the relative size of the compartment by 35% (Figure 2, K-N, P). Surprisingly, we also note that, for unknown reasons, the normally straight anterior/posterior boundary (Figure 2, K) becomes wavy when *babo-a* is knocked down with *hh-GAL4* (Figure 2, L).

Since genetic loss of *myo* affected wing disc cell size, we also assessed adult cell size upon RNAi knockdown of *babo-a* by measuring trichome density in the adult wings. Each trichome on the wing blade arises from a single wing disc epithelial cell. Therefore, by measuring the trichome density, relative cell size can be calculated. Knockdown of *babo-a* using *esg-GAL4* does not affect trichome density, whereas *ci-GAL4* result in a 13% increase in trichome density, i.e. smaller cells (Figure 2, Q).

Another way that cell size could be affected is by altering the thickness of the disc epithelium. If the disc epithelium is thin then the individual cells are likely smaller. Using confocal optical sectioning we observed that knocking down *babo-a* leads to an ~40% decrease in the epithelium thickness (Figure 2, K-N (cross-section), R).

Previous studies have shown that Babo activates dSmad2 in numerous different tissues. Additionally, vertebrate TGF $\beta$ /Activin type-I receptors have also been shown to cross talk with BMP R-Smads. We hypothesized that under wild type conditions, Myo/Babo signaling regulates disc growth via phosphorylation of dSmad2 but not Mad. As predicted, knocking down *babo-a* in the entire wing disc by simultaneously using *ci-GAL4* and *hh-GAL4* completely abolishes phospho-dSmad2 levels (Figure 2, S). Furthermore, the level of phospho-Mad in these discs is not changed (Figure 2, T). These results indicate that in the wing disc, Babo-A activates dSmad2, not Mad, to regulate normal tissue growth.

Taken together, and assuming no difference in the number of wing disc precursors after embryogenesis, we infer that *babo-a* regulates tissue size by regulating both cell size and likely cell proliferation over the course of larval development. The data indicate that Babo-A is the only functional isoform in the wing imaginal disc and its removal phenocopies *myo* mutants in regulating wing disc growth. Thus, similar to the mushroom body neurons (Awasaki et al., 2011), our data demonstrate that Myo signals solely through Babo-A in the wing imaginal disc.

### **Babo-A and Punt mediate non-canonical signaling in wing imaginal discs**

In addition to canonical signaling, Babo can, under special circumstances, also signal non-canonically by cross-talking with downstream components of the BMP/Dpp pathway (Peterson and O'Connor, 2013). Non-canonical Babo activity is only detectable in a protein null mutant of *dSmad2* or a strong RNAi knockdown of *dSmad2* (Peterson and O'Connor, 2013; Peterson et al., 2012; Sander et al., 2010). In the absence of its preferred target dSmad2, Babo promiscuously interacts with Mad, the BMP ortholog of dSmad2, which then represses *brk* expression causing disc overgrowth along the anterior-posterior axis (Peterson and O'Connor, 2013). We hypothesized that in the absence of *dSmad2*, non-canonical signaling (i.e. silencing of *brk*) is also mediated by Babo-A and not through ectopic expression of other receptor isoforms. Since Babo activity in *dSmad2* loss-of-function RNAi clones results in silencing of the *brk* (*B14-LacZ*) reporter (Müller et al., 2003; Peterson and O'Connor, 2013), we used this assay to first generate *dSmad2* RNAi clones and quantified the ectopic *brk-LacZ* silencing (Figure 3, A, J). Next, we performed genetic epistasis analysis by simultaneously knocking down *dSmad2* in clones along with each of the *babo* isoforms and then assayed for *brk-LacZ* rescue. Knocking down *dSmad2* and *babo-a* rescued *brk* reporter expression (Figure 3, A vs B), while RNAi of *dSmad2* and *babo-b* or *babo-c* did not (Figure 3, A vs C-D).

To further test if non-canonical activity of Babo-A occurs throughout the wing disc, we knocked down *dSmad2* in the entire disc using *esg-GAL4*, resulting in disc overgrowth which can be quantified by measuring the width/height ratio of the disc-pouch (Figure 3 Supplement 1, A-B) (Peterson and O'Connor, 2013; Sander et al., 2010). RNAi for *dSmad2* alone results in the W/H ratio increasing from 1.1 (ctrl, *esg*>) to 1.5 (*esg*>*idSmad2*) (Figure 3 Supplement 1, D-E). Similar to the *B14* de-repression, epistasis analysis with specific *babo* isoforms demonstrates that simultaneous RNAi of *babo-a*, and not *babo-b* or *babo-c*, suppresses the widening induced by *dSmad2* RNAi (Figure 3 Supplement 1). Taken together, these experiments suggest that Babo-A is the sole signaling receptor in the wing imaginal disc mediating both canonical and non-canonical signaling.

TGF $\beta$  signaling requires ligands binding to hetero-tetrameric type-I and type-II receptor complexes. There are two type-II receptors in the *Drosophila* genome: *punt* and *wit*, both of which can signal with Type-I receptors from either branch of the TGF $\beta$  superfamily (Upadhyay et al., 2017). Punt is more commonly utilized during development, and facilitates Dpp signaling in the wing imaginal disc in combination with the BMP type I receptors Tkv and Sax (Brummel et al., 1994; Fuentes-Medel et al., 2012; Letsou et al., 1995; Parker et al., 2006). In cell culture models however, Punt can also signal in combination with Babo and Activin-like ligands (Brummel et al., 1999; Jensen et al., 2009; Letsou et al., 1995). Conversely, Wit functions primarily at the neuromuscular junction with the BMP ligand Gbb (Marqués et al., 2002) although it has been shown to bind Myo in combination with Babo in mammalian cell culture (Lee-Hoeflich et al., 2005). Since both *punt* and *wit* are expressed in the wing imaginal disc, it is unclear whether one or both type II receptors are required for Myo-Babo signaling (Childs et al., 1993; Marqués et al., 2002). To address this issue, we utilized the *brk* silencing assay in RNAi clones as described above. First, we find that knocking down both *punt* and *wit* along with *dSmad2* completely rescues the ectopic *brk* silencing (Figure 3, E vs F). This result indicates that one or both of these receptors is required for *brk* silencing in the *dSmad2* RNAi clones. Next, we find that RNAi for *wit* does not rescue *brk* silencing (Figure 3, E vs G), however RNAi for *punt* completely suppresses the *dSmad2* RNAi induced *brk* silencing (Figure 3, E vs H). This result demonstrates that Punt signaling occurs, however it does not rule out that it may do so through Tkv, the Dpp type I receptor. To exam this issue, we knocked down *tkv* and *dSmad2* in clones and looked for *brk* silencing. We find that *dSmad2* RNAi silenced *brk* even in the absence of *tkv* demonstrating that Dpp and Tkv signaling is not required for this phenotype and that Babo is the primary type I receptor mediating these clonal effects. Taken together, these experiments demonstrate that Babo-A requires Punt, but not Wit, for repression of *brk* expression in this non-canonical signaling assay and it is likely that the same receptors are used for Myo signaling in wild type disc cells.

### **Muscle-derived myoglianin signals to the wing disc**

Growth factors such as Wg and Dpp are tissue intrinsic ligands, produced by and acting on the wing disc cells. We sought to determine if the same is true for Myo. The name *myoglianin* refers to the two tissues (muscles and glia) in which *myo* expression was initially observed (Lo and Frasch, 1999). More recent RNA *in situ* hybridization results suggested that *myo* is also expressed in the wing imaginal disc at low levels (Hevia and de Celis, 2013). To precisely determine the source of Myo that acts on the wing disc, we first examined the expression pattern of *myo* in late L3 larvae using a *myo-GAL4* reporter to drive *UAS-CD8-GFP* (Awasaki et al., 2011). We detect GFP expression in both Repo+ glial cells of the brain and the ventral ganglia, as well as the larval body wall muscles (Figure 4, A-B, Figure 4 Supplement 1), but not in any imaginal discs (Figure 4, A, Figure 4 Supplement 1). Thus, we conclude that either *myo* is not expressed in the wing disc or that our *myo-GAL4* construct does not include all of the endogenous enhancers.

To determine the functional source of Myo that controls imaginal disc growth, we conducted loss-of-function studies in the *dSmad2* null mutant background, and looked for suppression of the wing disc overgrowth phenotype. First, using null mutant alleles, we confirmed that loss of *myo* in *dSmad2* mutant background suppresses the *dSmad2* overgrowth, resulting in small discs similar in size to *myo* mutants (Figure 4, C-E, L). Next, we knocked down *myo* using tissue specific GAL4 drivers. To confirm efficacy of the RNAi constructs, we first used the *da-GAL4* driver to ubiquitously knock down *myo* in the *dSmad2* background and confirmed that it suppresses wing disc overgrowth (Figure 4, F vs G, L). However knocking down *myo* using either *esg-GAL4* (wing disc) or *repo-GAL4* (glia) failed to suppress the *dSmad2* wing disc overgrowth (Figure 4, F vs H, I). These results suggest that the wing discs are receiving a strong Myo signal even when *myo* is knocked down in the imaginal discs or glia. In contrast, RNAi knockdown of *myo* in body wall muscles, using either *mhc-GAL4* or *mef2-GAL4* drivers, completely suppresses the *dSmad2* disc overgrowth phenotype phenocopying the *dSmad2;myo* double mutant (Figure 4, F vs J, K). Therefore, we conclude that muscles are the major source of Myo that stimulates imaginal disc growth.

## Overexpression of Myo in muscle or fat body rescues *myo* mutant disc growth

While the suppression of disc overgrowth in a *dSmad2* mutant background strongly implicates muscle as the source of ligand, we also examined if Myo expression in muscle, or other non-disc tissues, could rescue the size of *myo* mutant discs. First, overexpression of *myo* in larval muscles in wild type animals results in wings that are larger than normal (Figure 5 Supplement 1). Next, we examined whether overexpression of *myo* in glia, muscles, or fat body is able to rescue the size of *myo* mutant discs. Overexpression in glia (*repo-GAL4*) results in partial rescue (Figure 5, C and F) while overexpression in muscle (*mef2-GAL4*, Figure 5, D and F) or fat body (*cgg-GAL4*, Figure 5, E and F) leads to complete rescue. These results clearly demonstrate that Myo produced in distant tissues can signal to wing discs, albeit with varying degrees of signaling strength depending on the source. Collectively, these results indicate that muscle-derived Myo acts as an endocrine-like ligand via the hemolymph to activate a specific receptor complex on disc cells, consisting of Babo-A and Punt, that signals to dSmad2 to promote imaginal disc growth.

## DISCUSSION

Understanding the physiologic roles of inter-organ signaling during development is an emerging and complex field. In particular, how and which inter-organ signals regulate organ/tissue growth remains an open question. In the present study, we demonstrate that the *Drosophila* Activin-like ligand Myoglianin is a myokine that acts systemically to fine tune imaginal disc growth. We suggest Myo tuning of disc growth may play an important role in maintaining proper allometric scaling of appendage size with the size of the muscles that control their movements.

### Only Myo regulates imaginal disc size

Although Babo/dSmad2 signaling has been previously implicated in imaginal disc growth control (Brummel et al., 1999; Hevia and de Celis, 2013; Peterson and O'Connor, 2013), the ligand(s)

responsible and their production sites(s) have not been identified. Previous *in situ* hybridization and RNAi knockdown experiments suggested that all three Activin-like ligands (Myoglianin, Activin $\beta$ , and Dawdle) contribute to control of wing size (Hevia and de Celis, 2013). However, we find no expression of these Activin-like ligands in imaginal discs, with the exception of *Act $\beta$*  which is expressed in differentiating photoreceptors of the eye imaginal disc (Moss-Taylor et al., 2019; Ting et al., 2007; Zhu et al., 2008). More importantly, using genetic null mutants, we show that only loss of *myo* affects imaginal disc size. The discrepancy in phenotypes between tissue-specific knockdown results and the genetic nulls is often noted and not fully understood (Di Cara and King-Jones, 2016; Gibbens et al., 2011). In addition to simple off-target effects within the wing disc itself, one possible explanation is that many GAL4 drivers are expressed in tissues other than those reported, potentially resulting in deleterious effects for the animal that indirectly affect imaginal disc size. Another possibility is that in *Act $\beta$*  and *daw* genetic null backgrounds a non-autonomous compensatory signal is generated by another tissue and this signal is not activated in the case of tissue-specific knockdown (Di Cara and King-Jones, 2016). We think both of these explanations are unlikely in this instance since we demonstrate that only the Babo-A receptor isoform is expressed and required in discs. Since we have previously shown that Daw only signals through isoform Babo-C, it is unclear why knockdown of *daw* in the wing disc would result in a small wing phenotype as previously reported (Hevia and de Celis, 2013; Jensen et al., 2009). We conclude that the small wing phenotypes caused by RNAi knockdown of *Act $\beta$*  or *daw* are likely the result of off-target effects and that Myo is the only Activin-type ligand that regulates imaginal disc growth.

### **Punt is required for efficient Babo-A signaling to dSmad2 in the wing disc**

The signaling ability of TGF $\beta$  ligands is modulated by the specific combinations of receptors and co-receptors to which they bind (Heldin and Moustakas, 2016). In *Drosophila*, the receptor requirements for effective signaling through dSmad2 likely vary for each ligand and tissue (Jensen et al., 2009). In this report, we find that Myo signaling in the wing disc requires Punt as the type II receptor and Babo-A as the type I receptor. Furthermore, we establish that Myo is the exclusive Activin-like ligand signaling to the

discs since loss of Myo eliminated detectable phosphorylation of dSmad2 in the wing imaginal disc. Since Babo-A is the only isoform expressed in wing discs, we also conclude that Myo is able to signal through this isoform in the absence of other isoforms. Whether Myo can also signal through Babo-B or C is not yet clear, but in the context of mushroom body remodeling Babo-A also appears to be the major receptor isoform utilized (Awasaki et al., 2011; Yu et al., 2013). The co-receptor Plum is also required for mushroom body remodeling, suggesting that Plum and Babo-A are both necessary for efficient Myo signaling. However, it is noteworthy that Plum null mutants are viable (Yu et al., 2013) while Myo null mutants are not. This observation suggests that Plum is not required for all Myo signaling during development. Further studies will be required to evaluate whether Plum is essential to mediate Myo signaling in imaginal discs.

The requirement of Punt as a type II receptor for production of an efficient signaling complex with Myo may be context dependent. In the mushroom body, indirect genetic evidence suggests that the two Type II receptors function redundantly (Zheng et al., 2006). Although both *punt* and *wit* are expressed in imaginal discs (Childs et al., 1993; Marqués et al., 2002), only loss of *punt* produces a phenotype in the *brk* reporter assay. To date, we have not been able to see clear signaling in S2 cells expressing Punt and Babo-A when Myo is added. It is also notable that a previous attempt to study Myo signaling in a heterotypic cell culture model also failed (Lee-Hoeflich et al., 2005). In that study, Myo was found to form a complex with Wit and Babo-A in COS-1 cells but no phosphorylation of dSmad2 was reported. One explanation is that effective signaling by Myo requires Punt, and Babo-A, and perhaps another unknown co-receptor that substitutes for Plum. Despite this caveat, our results provide *in vivo* functional evidence for a Myo signaling complex that requires Babo-A and Punt to phosphorylate dSmad2 for regulation of imaginal disc growth.

## **Proliferation and cell size**

Final tissue size is determined by several factors including cell size, proliferation, death rates, and duration of the growth period. While we did observe cell size changes upon manipulation of Myo

signaling, the direction of change depended on the genotype. In *myo* mutants, estimation of cell size via apical surface area indicates that the cells are ~20% smaller than wild-type. Although this measurement does not indicate the actual volume of the cells, it gives an indication of cell density in the epithelial sheet of the wing pouch, which is analogous to counting cells in the adult wing. RNAi knock down of *babo-a* in the entire disc produced smaller adult wings with larger (less dense) cells. This result differs from the *myo* mutant, but is similar to the reported adult wing phenotypes of *babo* mutants (Hevia and de Celis, 2013) and larval disc phenotypes of *dSmad2* mutants (Peterson and O'Connor, 2013). When *babo-a* is knocked down in one compartment, that compartment is reduced in size with smaller cells. We conclude that tissue size reduction is the consistent phenotype upon loss of Myo signaling, but cell size changes depend on the specific type of manipulation.

While cell size effects may be context dependent, it is notable that neither reduction in size of imaginal discs nor adult wing surface area can be explained solely by a cell size defect. Since we see no apoptotic increase in *myo* mutant discs, and because *dSmad2* knockdown also fails to alter apoptotic rate (Hevia and de Celis 2013), the mostly likely cause is an altered proliferation rate. Consistent with this view is that the large disc phenotype exhibited by *dSmad2* protein null mutants is clearly dependent on Myo and we and others have previously shown that this is the result of enhanced proliferation (Peterson and O'Connor, 2013; Hevia and de Celis 2013). Similarly earlier studies also showed that expression of activated Babo or activated *dSmad2* in wing discs also leads to larger wings with slightly smaller cells which is most easily explained by an enhanced proliferation rate (Brummel et al., 1999; Hevia and de Celis, 2013). It is worth noting that this proposed enhanced proliferation rate is difficult to detect since cell division is random with regard to space and time during development (Wartlick et al., 2011). Thus a ~20% reduction in adult wing size caused by a proliferation defect translates into about 1/5<sup>th</sup> of disc cells dividing on average 1 fewer times throughout the entire time course of larval development. Therefore, without prolonged live imaging, this small reduction in proliferation rate will not be detectable using assays that provide only static snapshots of cell division. It is worth noting, however, that previous clonal

studies also concluded that dSmad2 or Babo loss in wing disc clones resulted in a reduced proliferation rate (Hevia and de Celis, 2013).

One attempt to shed light on the transcriptional output of TGF $\beta$  signaling responsible for wing disc size employed microarray mRNA profiling of wild-type versus *dSmad2* gain- and loss-of-function wing discs (Hevia et al., 2017). However this study did not reveal a clear effect on any class of genes including cell cycle components, and it was concluded that the size defect is the result of small expression changes of many genes. Consistent with this view are dSmad2 Chromatin Immunoprecipitation experiments in Kc cells which revealed that dSmad2 is associated with many genomic sites and thus may regulate a myriad of genes (Van Bortle et al., 2015).

### **Is myoglianin function evolutionarily conserved?**

Insect *myoglianin* is a clear homolog of vertebrate *Myostatin* (*Mstn/GDF8*) (Hinck et al., 2016), a TGF $\beta$  family member notable for its role in regulating skeletal muscle mass. *Mstn* loss-of-function mutants lead to enlarged skeletal muscles (Grobet et al., 1997; McPherron and Lee, 1997). *Mstn* is thought to affect muscle size through autocrine signaling that limits muscle stem cell proliferation, as well as perturbing protein homeostasis via the Insulin/mTOR signaling pathways (Morikawa et al., 2016; Rodriguez et al., 2014). Similarly, *Gdf11*, a *Mstn* paralog, also regulates size and proliferation of muscles and adipocytes, and may promote healthy aging (Egerman et al., 2015; McPherron et al., 2009; Sinha et al., 2014). *Mstn* and *Gdf11* differ in where they are expressed and function. *Mstn* is highly expressed in muscles during development while *Gdf11* is weakly expressed in many tissues. Both molecules are found to circulate in the blood as latent complexes in which their N-terminal prodomains remain associated with the ligand domain. Activation requires additional proteolysis of the N-terminal fragment by Tolloid-like metalloproteases to release the mature ligand for binding to its receptors (Uhlén et al., 2015; Wolfman et al., 2003). Interestingly in *Drosophila*, the Myoglianin N-terminal domain was also found to be processed by Tolloid-like factors, but whether this is a prerequisite for signaling has not yet been established (Serpe and O'Connor, 2006). In terms of functional conservation in muscle size control, our results of both null

mutants and RNAi depletion indicates that it has little effect on muscle size. This contradicts a previous study in which muscle-specific RNAi knockdown of *myo* was reported to produce larger muscles similar to the vertebrate observation (Augustin et al., 2017). The discrepancy between our tissue-specific RNAi knockdown and previous studies is not clear, but our null mutant analysis strongly argues that *Drosophila* Myo does not play a role in muscle size control. Intriguingly however, we find that loss of *Actb*, another ligand that signals through Babo and dSmad2, results in a smaller muscles (Moss-Taylor et al., 2019) contrary to that produced by loss of vertebrate *Mstn* and various other vertebrate Activin family members. Recent data has shown that *Drosophila* *Actb* is the only Activin-like ligand that affects muscle growth, and it does so, in part, by regulating Insulin/Tor signaling in the opposite direction compared to vertebrates (Kim and O'Connor, 2020). Thus, in *Drosophila* the Myo/Activin pathway promotes muscle growth while in vertebrates it inhibits muscle growth.

### **Intrinsic (intra-organ) vs extrinsic (inter-organ) mode of Myo signaling and the significance of muscle to disc inter-organ communication**

The most intriguing finding of this study is that muscle-derived Myo acts non-autonomously to regulate imaginal disc growth. This is in stark contrast to the two BMP ligands, Dpp and Gbb, which are produced by disc cells and act autonomously within the disc itself to regulate both growth and pattern (Haerry et al., 1998; Minami et al., 1999). The fact that a TGF $\beta$  ligand can act in an endocrine-like manner is not particularly novel since many vertebrate members of the TGF $\beta$  family, including Myostatin, the closest homolog to *Drosophila* Myoglianin, are found in the blood (Sinha et al., 2014). Even the disc intrinsic molecule Dpp has been recently shown to be secreted into the hemolymph where it circulates and signals to the prothoracic gland to regulate a larval nutritional checkpoint (Setiawan et al., 2018). Several additional reports indicate that ligands from the *Drosophila* Activin-like subfamily also circulate in the hemolymph and function as inter-organ signals. For example, muscle derived Act $\beta$  and Myo signal to the fat body to regulate mitochondrial function and ribosomal biogenesis, respectively (Demontis et al., 2014; Song et al., 2017). In addition, Dawdle produced from many tissue sources can

signal to the Insulin producing cells and the midgut to stimulate Insulin secretion and repress expression of sugar metabolizing genes, respectively (Chng et al., 2014; Ghosh and O'Connor, 2014). Thus many TGF $\beta$  type factors act as both paracrine and endocrine signals depending on the tissue and process involved.

The phenotype of the *myo* mutant animal supports our claim that endogenous Myo contributes to imaginal disc growth. The ectopic expression assay produced various wing disc sizes when Myo was expressed in different tissues, indicating that the growth response likely depends on the level of Myo being produced in the distal tissue. Loss of glial derived Myo is not sufficient to suppress overgrowth of *dSmad2* mutant discs, but overexpression of Myo in glia did partially rescue size of *myo* null wing discs, likely because the *repo*-Gal4 driven overexpression produces more ligand than endogenous glia. Likewise, expression from a large tissue such as muscle or fat body likely produces more Myo than glia leading to normal disc growth or even overgrowth. It is also possible that Myo signaling activity is modified depending on the tissue source. Like other TGF $\beta$  family members, Myo requires cleavage by a furin protease at its maturation site to separate the C-terminal ligand from the prodomain (Lee-Hoeflich et al., 2005; Lo and Frasch, 1999). Myo may also require a second cleavage by a Tolloid protease family member to achieve full dissociation of the prodomain from the ligand to ensure complete activation (Serpe and O'Connor, 2006). Either of these cleavage reactions, or any other step impacting the bioavailability of active Myo ligand, may vary with tissue or may be modulated by environmental conditions.

What is the rationale for larval muscle regulating imaginal discs size? A possible reason is that for proper appendage function, the muscle and the structure (leg, wing, and haltere) that it controls should be appropriately matched to ensure optimal organismal fitness for the environmental niche the adult occupies. For example, a large muscle powering a small wing might result in diminished fine motor control. Conversely, a small muscle may not be able to power a large wing to support flight. However, the multi-staged nature of muscle and appendage development complicates this picture. Larval muscles are

histolysed during metamorphosis and do not contribute to the adult muscle. However, remnants of larval muscles in the thoracic segment are preserved as fibers that act as scaffolds upon which the larval myoblasts infiltrate and fuse to become the adult indirect flight muscles (Dutta et al., 2004). Thus, at least for the indirect flight muscles, the size of the larval muscle scaffold might contribute to the building of a bigger adult muscle. Another possibility invokes a signal relay system. Wg and Serrate/Notch signaling from the wing disc epithelial cells control myoblast proliferation during larval development (Gunage et al., 2014). Thus it may be that Myo signaling from the larval muscles stimulates proliferation of the disc epithelial layer which in turn enhances Wnt and Serrate/Notch signaling to myoblasts to increase their number thereby coordinating the adult appendage size with muscle size. A final scenario is that, since muscle is a major metabolic and endocrine organ, Myo production may be regulated by the general metabolic state of the larva. If healthy, high levels of Myo, in concert with other growth signals such as insulin, leads to a bigger fly with large wings, and if the metabolic state is poor then lower Myo levels leads to diminished proliferation and a smaller cell size resulting in a smaller fly with small wings.

Regardless of the precise mechanism, the ability of the muscle to control appendage size has interesting implications in terms of evolutionary plasticity. The proportionality of insect wing size to body size can vary over a large range (Shingleton et al., 2008), but the mechanism responsible for determining this particular allometric relationship for a given species is not understood. We have recently demonstrated that in *Drosophila*, motor neuron derived Act $\beta$ , another TGF $\beta$  superfamily member, can dramatically affect muscle/body size (Moss-Taylor et al., 2019). Therefore, it is tempting to speculate that evolutionary forces might modulate the activity of these two genes to produce an appropriate body-wing allometry that is optimal for that species' ecological niche.

## Figure Legends

**Figure 1. *Myoglianin* regulates size of imaginal discs and activates dSmad2.** (A-D) DAPI staining of wing imaginal discs from late third instar larvae of various TGF $\beta$  ligand mutants. Scale bar, 100 $\mu$ m. (E) Wing disc size of *myo* mutants (blue bar) are approximately 40% smaller than control, *Activin $\beta$*  mutant discs (C) are the same size as controls (green bar), and *dawdle* mutant discs (D) are ~16% smaller (red bar) (n > 20 per group). (F-I) Wing, leg, and haltere imaginal discs of *myo1* null mutants are 50% smaller vs heterozygous *myo1/+* controls. (H) Size of various imaginal discs, normalized to controls. (I) Size ratio of haltere/wing disc (.25) or leg/wing disc (.3) are the same in *myo* mutants vs controls. (J-K) Phalloidin staining showing the apical actin-belt of epithelial cells in wing discs; each cell has a distinct actin belt that defines the edges of a cell (scale bar = 10 $\mu$ m, n > 5 per group). Single confocal section is shown with the whole disc in insert with the magnification of the pouch region outlined. (L) Based on cell density, *myo* mutant discs cells are 12% smaller vs control. (M-N) Phospho-Histone H3-pSer10 (pH3) staining to mark mitotic cells in early third instar wing discs, showing no difference in number of mitotic cells in *myo* mutants (scale bar = 100  $\mu$ m, n = 5 per group). Number of mitotic cells per 100  $\mu$ m<sup>2</sup> is plotted (O). (P-Q) Phalloidin staining showing the late 3<sup>rd</sup> instar larvae body wall muscle #6 (green highlight) and #7 (red highlight) (scale bar = 100 $\mu$ m, n = 10). Muscle area (R) and number of nuclei per fiber (S) is plotted. *myo* mutant muscles are 13% smaller (p = 0.02) yet have the same number of nuclei per fiber (S). (T) Western blot analysis of phospho-dSmad2 levels in wing discs, with quantification from 3 separate blots. *myo* mutants lack p-dSmad2 signal indicating loss of canonical signaling. (U) Model for canonical TGF $\beta$  signaling in wing imaginal disc via Myo/Babo/dSmad2. C-terminal activation of dSmad2 (yellow star) results in regulation in expression of downstream target genes which is required for proper growth of imaginal discs.

**Figure 2. *Baboon-A* regulates wing disc growth.** (A) Cartoon illustrating the gene region and splice isoforms of TGF $\beta$ /Activin type-I receptor *babo*. The 3 splice isoforms are the result of 3 different

mutually exclusive 4th exons; the remaining exons (not shown) are the same for all *babo* isoforms. (B) qPCR analysis of *babo* isoform expression from late 3<sup>rd</sup> instar wing imaginal discs identifies only *babo-a* expression. expression level is relative to *Rpl32*, the expression level of *babo-b* and *babo-c* are indicated by the numbers above their respective bars. (C-J) Adult wings of animals where specific *babo* isoforms were knocked down in the entire wing blade (*esg-GAL4*, C-F) or one compartment (*ci-GAL4*, G-J). Knockdown of *babo-a* by *esg-GAL4* results in a smaller wing blade (D) and by *ci-GAL4* results in a smaller anterior compartment (H), scale bar 1 mm, n = 5-12 per group. Size measurements of tissue size (indicated by shading in C and G) are quantified in O. (K-N) Imaginal discs from late 3<sup>rd</sup> instar larvae where specific *babo* isoforms were knocked down in only the posterior compartment by *hh-GAL4*, marked with GFP, the size of the posterior compartment is measured relative to the entire wing pouch as illustrated by the brackets, the anterior/posterior boundary is highlighted by the dashed line, scale bar = 50µm, n = 3-6 per group. (O) Quantification of tissue size from C-J. Knockdown of *babo-a* by *esg-GAL4* and *ci-GAL4* results in 40% and 50% respectively smaller tissues (O, blue bars). (P) Quantification of the relative size of the posterior compartment, data normalized to controls. Knockdown of *babo-a* by *hh-GAL4* results in a 35% reduction of the posterior compartment relative to the overall size of the wing disc. (Q) Quantification of trichome density in the affected region of adult wings from C-J, measurements are normalized to their respective GAL4 x *w1118* controls. Knockdown of *babo-a* using *esg-GAL4* does not affect trichome density, whereas knockdown with *ci-GAL4* results in higher trichome density, indicating smaller cells (P, blue bar). (R) Epithelium thickness was quantified from orthogonal views of the imaginal discs from K-N. Knockdown of *babo-a* results in a 29% decrease in epithelium thickness of the posterior compartment. (S-T) Western blot analysis of phospho-dSmad2 and phospho-Mad in L3 imaginal discs. Knockdown of *babo-a* throughout the imaginal discs using both *ci-GAL4* and *hh-GAL4* leads to loss of phospho-dSmad2 signal (S), but not phospho-Mad signal (T). Tubulin is shown as a loading control. n = 10 per lane.

**Figure 3. Babo-A and Punt are required for non-canonical silencing of *brk*.** In the background of *brk-LacZ* reporter line random GFP<sup>+</sup> (green) clones were induced by heat shock 48 hours prior to analysis (see methods for details). GFP<sup>+</sup> marked clones also express RNAi for the indicated genes to the left of respective panels. Clones at the lateral edges of the disc were analyzed for patterning defects of the *brk* reporter. (A-D) Analysis of Babo isoforms. (E-I) Analysis of Type-II receptors. (A-I) Maximum intensity projections of wing imaginal discs stained with DAPI (blue) and anti  $\beta$ -gal (red), and fluorescent clone marker (green), scale bar = 100 $\mu$ m. (A'-I') Single confocal section of higher magnification of insert in (A-I) showing GFP<sup>+</sup> marked clone expressing RNAi for indicated genes. Clones are outlined with white lines, scale bar = 25 $\mu$ m. (A''-I'') Same confocal section as in (A'-I') with outlined clones showing *brk-LacZ* reporter expression pattern, scale bar = 25 $\mu$ m. *Brk* reporter is ectopically silenced in dSmad2 RNAi clones (A and E). This ectopic silencing is rescued by the concomitant RNAi of *babo-a* alone (A'' vs B'') but not *babo-b* or *babo-c* (A'' vs C'' or D''). dSmad2 RNAi dependent *brk* reporter silencing (E'') can be rescued by the concomitant RNAi of both Type-II receptors *punt* and *wit* (E'' vs F''). RNAi for *wit* does not rescue *brk* reporter (E'' vs G''). RNAi for *punt* completely rescues the *brk* reporter (E'' vs H''). *brk* silencing in dSmad2 RNAi clones at the lateral edge of the disc is not mediated by *thickveins* (*tkv*, BMP Type-I receptor), since concomitant RNAi for *tkv* does not rescue ectopic *brk* silencing (E'' vs I''), indicating that *brk* silencing in dSmad2 RNAi clones occurs via activation of TGF $\beta$ /Activin signaling. (J) Quantification of relative *brk-LacZ* reporter expression in GFP<sup>+</sup> clones (n = 9 clones per condition).

**Figure 4. Muscle derived Myo is required for non-canonical Babo activity in imaginal discs.** (A) 3<sup>rd</sup> instar larval fillet showing *myo-GAL4* driving mCD8-GFP (green), DAPI (blue) counterstain to image all tissues in the field of view. DAPI channel (A') shows muscle and cuticle-associated cell nuclei, as well as the brain and several imaginal discs. GFP channel (A'') represents the expression pattern of the *myo-GAL4* reporter transgene. Note that the wing imaginal discs does not express detectable GFP, scale bar = 500  $\mu$ m. (B) Higher magnification of 3<sup>rd</sup> instar larval brain from *myo>NLS-GFP*, and co-stained with

anti-Repo marking glial cells. Arrowheads indicate overlap of *myo-GAL4* expression in a subset of Repo+ glial cells, scale bar = 100  $\mu$ m. (C-E) *myo* is epistatic to *dSmad2*, and rescues the disc overgrowth phenotype, scale bar = 100 $\mu$ m, n > 5. *dSmad2<sup>f4</sup>* mutant discs (C) are overgrown, however *myo* mutant discs (D) retain the normal shape of the tissue. The *dSmad2<sup>f4</sup>;myo* double mutant discs (E) are similar to *myo* mutant discs, demonstrating rescue of the overgrowth phenotype, and that Myo can function in non-canonical Babo activation. (F-K) Muscle specific RNAi of *myo* is sufficient to rescue wing disc overgrowth phenotype of *dSmad2* mutants, scale bar = 100 $\mu$ m, n > 5 per group. RNAi of *myo* ubiquitously using *da-GAL4* rescues the wing disc overgrowth (F vs G), phenocopying double *dSmad2;myo* double mutants (E vs G). RNAi of *myo* in either wing discs (*esg-GAL4*) or glia (*repo-GAL4*) is unable to rescue disc overgrowth (F vs H or I). RNAi of *myo* in larval muscles using *mef2-GAL4* or *MHC-GAL4* rescues the disc overgrowth phenotype (F vs J or K), which phenocopies ubiquitous *myo* RNAi (G vs J or K). (L) quantification of wing shape widening in C-K. *dSmad2* wide wing is rescued by *myo* (C vs E) and knockdown of *myo* in muscles (F vs J or K).

**Figure 5. Overexpression of *myo* in muscles or fat body rescues wing disc size of *myo* mutants.** (A-B) *Myo* mutant discs (B) are smaller than heterozygous controls (A), and (C-E) wing discs from *myo* overexpression rescue experiments, scale bar = 100  $\mu$ m, n > 19. *Myo* overexpression in glial cells using *Repo-GAL4* partially rescues wing disc size (B vs C). Overexpression in muscles completely rescued *myo* mutant discs back to wild type size (B vs D vs A). *Myo* is not normally expressed in the fat body (Figure 4). However, ectopic overexpression in the fat body was sufficient to rescue discs back to wild-type size (B vs E vs A). (F) Quantification of wing disc size from (A-E).

**Figure 1 Supplement 1. *myo* mutants show no defects in cell death or cell growth.** (A-B) Third instar larval wing discs stained for cleaved-caspase 3 shows no increase in cell death of *myo* mutant discs. (C-D)

Early third instar (90-96 hrs AEL) larval wing discs stained for phospho-S6, downstream of TOR signaling, shows no defect in cell growth patterns in *myo* mutant discs. Scale bar 100  $\mu$ m, n = 5-10 per group.

**Figure 1 Supplement 2. Trans-heterozygote *myo* mutants do not have larger muscles.** Third instar larval fillets stained with phalloidin (green) and DAPI (magenta) show no difference in muscle size for trans-heterozygotes *myo1* and *myoCR2* alleles vs heterozygote controls, scale bar = 100  $\mu$ m, n = 8-14.. The size of muscle 6 in segment A2 is quantified. Knocking down *myo* in muscles using *mef2-GAL4* does not significantly increase muscle size vs no GAL4 control. Knocking down *myo* ubiquitously using *da-GAL4* does result in larger muscles, however no larger than the genetic nulls.

**Figure 2 Supplement 1. qPCR analysis of Babo isoform expression in various tissues from late third instar larvae.** Fat-body and gut express only *babo-c*, whereas brain samples predominantly express *babo-a*. The carcass sample produces detectable amounts of all three isoforms. This sample contains muscle, cuticle, and associated cells, precluding assignment of isoform expression to cell types. Expression levels are relative to *Rpl23*.

**Figure 3 Supplement 1. RNAi for *babo-a* rescues wing disc overgrowth due to *dSmad2* RNAi.** (A) Representative image of wild-type (control) imaginal disc. The width/height ratio is generally 1.1 (black line in D) for controls (blue diamonds in D). (B) RNAi for *dSmad2* throughout the disc using *esg-GAL4* leads to ectopic *brk* silencing which results in overgrowth of the tissue along the anterior/posterior axis (widening) (red squares in D). (C) Simultaneous RNAi for *dSmad2* and *babo-a* rescues the widening phenotype where the W/H ratio is back to 1.1 (green circles in D). (D) The size of all wing discs measured are depicted on a width by height chart. (E) Quantification of the width/height ratio of each disc

as illustrated in A-C. Control samples (blue diamonds) have an average ratio of 1.1; RNAi for *dSmad2* (red squares) leads to widening with a ratio of 1.5; RNAi for *babo-a* (green circles) alone rescues the widening back to wild type ratio of 1.1. These discs are smaller than wild type due to loss of canonical Baboon activity (Figure 1 and 2). There is no effect on widening by knocking down either *babo-b* or *babo-c* (blue and yellow circles vs red squares).

**Figure 4 Supplement 1. Higher magnification of larval filet showing *myo-GAL4* expression pattern.**

(A) Fillet of *myo>CD8-GFP* larvae showing expression pattern of the *myo-GAL4* line, scale bar = 500µm. Image is the same as in Figure 4, dashed boxes are shown in higher magnification in B-C. (B) High magnification of the wing imaginal disc from A, scale bar = 200µm. No GFP signal is observed in the wing disc in B'', the dashed outline of the wing disc shows where the wing disc should be in B''. (C) High magnification of the larval brain from A, scale bar = 200µm. GFP signal can be detected in the optic lobes as well as the ventral ganglion of the brain in C''. (D) Split channel image of the image from Figure 4B, scale bar = 100µm. Arrowhead show overlap for the *myo>NLS-GFP* signal and the Repo+ cells.

**Figure 5 Supplement 1.** (A) Muscle specific *myo* overexpression in addition to endogenous levels increases final wing size of adults. (B) Representative wings from A of control (smaller wing) vs *MHC>myo* (larger wing) superimposed to show difference in size.

## Materials and Methods

| Key Resources Table                        |                   |                                     |                   |                                    |
|--------------------------------------------|-------------------|-------------------------------------|-------------------|------------------------------------|
| Reagent type (species) or resource         | Designation       | Source or reference                 | Identifiers       | Additional information             |
| gene ( <i>Drosophila melanogaster</i> )    | myo               |                                     | FLYB:FB gn0026199 |                                    |
| gene ( <i>D. melanogaster</i> )            | Act $\beta$       |                                     | FLYB:FB gn0024913 |                                    |
| gene ( <i>D. melanogaster</i> )            | daw               |                                     | FLYB:FB gn0031461 |                                    |
| gene ( <i>D. melanogaster</i> )            | babo              |                                     | FLYB:FB gn0011300 |                                    |
| gene ( <i>D. melanogaster</i> )            | Smox              |                                     | FLYB:FB gn0025800 | Synonym: dSmad2                    |
| genetic reagent ( <i>D. melanogaster</i> ) | W <sup>1118</sup> | Bloomington Drosophila Stock Center | RRID:BDS C_5905   |                                    |
| genetic reagent ( <i>D. melanogaster</i> ) | myo <sup>1</sup>  | Awasaki et al 2011                  | FLYB:FB al0267082 | Synonym: myo $\Delta$ <sup>1</sup> |

|                                            |                           |                                     |                    |                                      |
|--------------------------------------------|---------------------------|-------------------------------------|--------------------|--------------------------------------|
| genetic reagent ( <i>D. melanogaster</i> ) | Act $\beta$ <sub>80</sub> | Zhu et al 2008                      | FLYB:FB al021739 2 | Synonym: Act $\beta$ <sub>ed80</sub> |
| genetic reagent ( <i>D. melanogaster</i> ) | daw <sub>11</sub>         | Serpe & O'Connor 2006               | FLYB:FB al021232 6 |                                      |
| genetic reagent ( <i>D. melanogaster</i> ) | myo <sub>CR2</sub>        | This paper                          |                    | See Materials and Methods            |
| genetic reagent ( <i>D. melanogaster</i> ) | dSmad2 <sub>F4</sub>      | Peterson et al 2012                 | FLYB:FB al026851 2 | Synonym: Smox <sub>F4</sub>          |
| genetic reagent ( <i>D. melanogaster</i> ) | babo-a miRNA              | Awasaki et al 2011                  | FLYB:FBt p0071178  | Also a new allele at VK37; see M & M |
| genetic reagent ( <i>D. melanogaster</i> ) | babo-b miRNA              | Awasaki et al 2011                  | FLYB:FBt p0071179  |                                      |
| genetic reagent ( <i>D. melanogaster</i> ) | babo-c miRNA              | Awasaki et al 2011                  | FLYB:FBt p0071180  |                                      |
| genetic reagent ( <i>D. melanogaster</i> ) | Myo-GAL4                  | Awasaki et al 2011                  | FLYB:FBt p0071181  |                                      |
| genetic reagent ( <i>D. melanogaster</i> ) | esg-GAL4                  | Bloomington Drosophila Stock Center | FLYB:FB al009882 3 | Lab stock is esg-GAL4/Cyo-GFP        |
| genetic reagent ( <i>D. melanogaster</i> ) | ci-GAL4                   | Herman Steller                      | FLYB:FBt p0022318  | Source obtained from G Morata        |
| genetic reagent ( <i>D. melanogaster</i> ) | hh-GAL4                   | Herman Steller                      | FLYB:FB al012196 2 | Source obtained from G Morata        |

|                                            |           |                                                    |                          |                              |
|--------------------------------------------|-----------|----------------------------------------------------|--------------------------|------------------------------|
| genetic reagent ( <i>D. melanogaster</i> ) | da-GAL4   | Bloomington<br>on<br>Drosophila<br>Stock<br>Center | FLYB:FB<br>al004257<br>3 |                              |
| genetic reagent ( <i>D. melanogaster</i> ) | myo miRNA | Awasaki et<br>al 2011                              | FLYB:FBt<br>p0071174     |                              |
| genetic reagent ( <i>D. melanogaster</i> ) | Mef2-GAL4 | Bloomington<br>on<br>Drosophila<br>Stock<br>Center | FLYB:FB<br>al005238<br>5 |                              |
| genetic reagent ( <i>D. melanogaster</i> ) | idSmad2   | Peterson<br>et al 2012                             | FLYB:FB<br>al026851<br>4 |                              |
| genetic reagent ( <i>D. melanogaster</i> ) | B14-LacZ  | Muller et al<br>2003                               | FLYB:FB<br>al014800<br>7 |                              |
| genetic reagent ( <i>D. melanogaster</i> ) | iPunt     | This paper                                         |                          | See Materials<br>and Methods |
| genetic reagent ( <i>D. melanogaster</i> ) | iWit      | This paper                                         |                          | See Materials<br>and Methods |
| genetic reagent ( <i>D. melanogaster</i> ) | iTkV      | Peterson<br>et al 2012                             | FLYB:FB<br>al026851<br>5 |                              |
| genetic reagent ( <i>D. melanogaster</i> ) | iMyo      | This paper                                         |                          | See Materials<br>and Methods |
| genetic reagent ( <i>D. melanogaster</i> ) | Repo-Gal4 | Bloomington<br>on<br>Drosophila<br>Stock<br>Center | FLYB:FB<br>al012727<br>5 |                              |

|                                            |                                    |                                                    |                                     |                                                     |
|--------------------------------------------|------------------------------------|----------------------------------------------------|-------------------------------------|-----------------------------------------------------|
| genetic reagent ( <i>D. melanogaster</i> ) | Mhc-Gal4                           | Bloomington<br>on<br>Drosophila<br>Stock<br>Center | FLYB:FBt<br>i0160475                | P{Mhc-<br>Gal4.K}2                                  |
| genetic reagent ( <i>D. melanogaster</i> ) | Mhc(f)-GAL4                        | N.<br>Perrimon                                     | FLYB:FBt<br>i0012514                | P{GAL4-<br>Mhc.W}MHC-<br>82                         |
| genetic reagent ( <i>D. melanogaster</i> ) | Cg-Gal4                            | Bloomington<br>on<br>Drosophila<br>Stock<br>Center | FLYB:FB<br>al010472<br>6            |                                                     |
| genetic reagent ( <i>D. melanogaster</i> ) | UAS-Myo                            | Gesualdi &<br>Haerry<br>2007                       | FLYB:FBt<br>p0039710                |                                                     |
| genetic reagent ( <i>D. melanogaster</i> ) | iRFP                               | Bloomington<br>on<br>Drosophila<br>Stock<br>Center | BDSC:41<br>554                      |                                                     |
| genetic reagent ( <i>D. melanogaster</i> ) | iGFP                               | Bloomington<br>on<br>Drosophila<br>Stock<br>Center | BDSC:67<br>852                      |                                                     |
| antibody                                   | p-dSmad2<br>(rabbit<br>monoclonal) | Cell<br>Signaling<br>Technology                    | Cat#<br>3108;<br>RRID:AB<br>_490941 | WB (1:1000);<br>detects<br>phosphorylated<br>dSmad2 |
| antibody                                   | Tubulin (mouse<br>monoclonal)      | Sigma-<br>Aldrich                                  | Cat#<br>T9026                       | WB (1:1000)                                         |

|          |                                       |                     |                            |                                        |
|----------|---------------------------------------|---------------------|----------------------------|----------------------------------------|
| antibody | p-Mad (rabbit polyclonal)             | Peterson et al 2012 |                            | WB (1:500); detects phosphorylated Mad |
| antibody | Repo (mouse monoclonal)               | DSHB                | Cat# 8D12; RRID:AB_528448  | IF(1:100)                              |
| antibody | beta-galactosidase (mouse monoclonal) | Promega             | Cat# Z378A; RRID:AB_430877 | IF(1:1000)                             |

#### Fly strains:

TGF $\beta$  mutants: *myo1*, *Act680*, *daw11*, *dSmad2<sup>F4</sup>* are described previously (Awasaki et al., 2011; Peterson and O'Connor, 2013; Serpe and O'Connor, 2006; Zhu et al., 2008). The new *myocr2* allele is described in Kim and O'Connor, 2020. Isoform miRNA lines for *babo* and *myo-GAL4* are described previously (Awasaki et al., 2011). We generated a new line of UAS-driven *babo-a* miRNA at the VK37 attP site using the published construct (used for Figure 2 S,T). RNAi lines for *dSmad2* and *tkv* and the strategy used to generate new RNAi lines are described previously (Peterson and O'Connor, 2013; Peterson et al., 2012). New RNAi lines for *wit* targeted 1103-1608 (NM\_079953.3), and *punt* targeted 1069-1582 (NM\_169591.1). RNAi lines for *myo* targeted 2259-3503 (NM\_166788.2) utilizing the “snapback” gDNA/cDNA hybrid method (Kalidas and Smith, 2002). Stocks and methods used for induction of GAL4 flp-out clones are described previously (Peterson and O'Connor, 2013). Briefly, clones were induced by incubation at 37°C for 30 minutes. Larvae were dissected 48 hours later at wandering L3 stage.

*Ci-GAL4* and *hh-GAL4* were kind gifts from H. Steller (Rockefeller University). A version of MHC we labeled *MHC<sub>f</sub>-GAL4* was a kind gift from N. Perrimon (HHMI, Harvard). The following reagents are available from Bloomington *Drosophila* Stock Center: *da-GAL4*, *esg-GAL4*, *repo-GAL4* (#7415), *mef2-GAL4* (#27390), *MHC-GAL4* (#55133), *cg-GAL4* (#7011), GFP knockdown (#41554), RFP knockdown (#67852), *UAS-mCD8::GFP*, *UAS-GFP.nls*.

### Microscopy and Antibodies:

Primary antibodies for IHC include cleaved Caspase-3 (Cell Signaling #9661), phospho-Histone3 (S10) (Sigma, H0412), and Repo (DSHB 8D12). For B14-LacZ reporter detection, wing discs were stained with anti- $\beta$ -galactosidase (Promega, #Z378A). AlexaFluor 568 or 647 (Invitrogen) conjugated secondary antibodies were used when required. Larval muscle and wing disc epithelium actin-belt were stained with rhodamine-phalloidin. To measure wing disc size, tissues were stained with DAPI. To assess *brk* reporter expression in clones, the red IHC signal was compared within a GFP-marked clone and a neighboring patch of control cells. Background signal was subtracted, and a ratio was calculated such that 1 indicates no change of reporter signal in the clone and lower numbers indicated repression of *brk*. Clones from multiple discs were selected from three regions that normally express the reporter. Signals were extracted from single Z sections using a line plot (width 5) in FIJI and visualized with the RGBProfilesTools plug-in to estimate the clone boundary.

Tissues for fluorescence microscopy were mounted with 80% Glycerol in PBS (0.1% TritonX-100). Wide-field images taken with a 20X objective on a Zeiss Axiovert microscope. CARV Confocal images were captured using a 20X objective on a Zeiss Axiovert. We also used the Zeiss LSM710 for confocal and “tile-scanning” imaging.

For adult wings, animals were dissected in 95% ethanol, and mounted with (50:50) Canadian balsam and wintergreen oil solution. Images were taken with a 4X objective (for whole wing) and 40X objective (for trichome density).

Images were processed in FIJI (imageJ). Wing disc size was calculated with the DAPI staining then using the threshold and measure functions. For larval muscle size and adult wing size, outlines were drawn using the polygon tool.

#### Western Blot:

Mid-late third instar larvae were dissected in cold PBS, and wing imaginal discs were collected and washed on ice. Total protein was extracted with RIPA buffer (Cell Signaling) with cComplete protease inhibitor (Roche) and PhosSTOP phosphatase inhibitor (Roche). Lysates were mixed with reducing sample buffer, boiled, and 10 µl of sample were run on 4-12% graded precast gels (Invitrogen). Resolved protein samples were transferred to the PVDF membrane. Membrane blocking and probing were performed using standard protocols for ECL. Antibodies used for western blot: phospho-Smad2 (Cell Signaling #3108), rabbit phospho-Smad3 polyclonal affinity purified with phospho-Mad peptide (Peterson et al., 2012), Tubulin (Sigma #T9026), goat anti-mouse HRP, and goat anti-rabbit HRP. phospho-dSmad2 were quantified in Fiji and normalized using tubulin or a non-specific band for loading control.

#### qPCR:

Late-third instar larvae were dissected in cold PBS, and tissues were pooled and washed in PBS on ice. Tissues were homogenized in Trizol (Invitrogen) and Total RNA purified using RNeasy Mini Kit (Qiagen). cDNA libraries were made using SuperScript-III (Invitrogen). qPCR was performed using SYBR green reagent (Roche) on a LightCycler 480. *Rpl23* was used as a

housekeeping gene for normalization. We confirmed that primer sets for all three isoforms amplify equivalently using *babo-a*, *b* and *c* control cDNA templates. The following qPCR primers were used for *babo* isoforms:

*babo-a*: F 5' GGCTTTTGTTTCACGTCCGTGGA 3'

*babo-a*: R 5' CTGTTTCAAATATCCTCTTCATAATCTCAT 3'

*babo-b*: F 5' GCAAGGACAGGGACTTCTG 3'

*babo-b*: R 5' GGCACATAATCTTGGACGGAG 3'

*babo-c*: F 5' GACCAGTTGCCACCTGAAGA 3'

*babo-c*: R 5' TGGCACATAATCTGGTAGGACA 3'

#### Statistics:

Statistical analyses were performed using Prism 8 (Graphpad). All experiments were repeated at least twice. Sample size was determined using published methods in the field, n values represent biological replicates per group. Data collection and analysis were not blind. Quantitative data are plotted as mean with standard deviations. Significance was determined using 2-tailed t-test with Welch's correction or an ANOVA with post-hoc multiple comparisons analysis. P values < 0.05 = \*, < 0.01 = \*\*, < 0.001 = \*\*\*.

## Acknowledgements

We would like to thank MaryJane O'Connor, Heidi Bretscher, Tom Neufeld, Jeff Simon, and Jim Ervasti for comments on the manuscript and valuable feedback on the project. Ashley Arthur conducted the experiment for Figure 2 Supplement 1. We also thank Louise Lu for quantification of *babo* isoform primer amplification efficiency. Bloomington Drosophila Stock Center for numerous fly lines. *Ci-GAL4* and *hh-GAL4* lines were a gift from Herman Steller

## Funding

National Institute of Health grant 1R35GM118029

## References

- Akiyama, T., Marqués, G. and Wharton, K. A.** (2012). A large bioactive BMP ligand with distinct signaling properties is produced by alternative proconvertase processing. *Sci. Signal.* **5**, ra28.
- Augustin, H., McGourty, K., Steinert, J. R., Cochemé, H. M., Adcott, J., Cabecinha, M., Vincent, A., Halff, E. F., Kittler, J. T., Boucrot, E., et al.** (2017). Myostatin-like proteins regulate synaptic function and neuronal morphology. *Development* **144**, 2445–2455.
- Awasaki, T., Huang, Y., O'Connor, M. B. and Lee, T.** (2011). Glia instruct developmental neuronal remodeling through TGF- $\beta$  signaling. *Nat. Neurosci.* **14**, 821–3.
- Boulan, L., Milán, M. and Léopold, P.** (2015). The Systemic Control of Growth. *Cold Spring Harb. Perspect. Biol.* **7**,.
- Brummel, T. J., Twombly, V., Marqués, G., Wrana, J. L., Newfeld, S. J., Attisano, L., Massagué, J., O'Connor, M. B. and Gelbart, W. M.** (1994). Characterization and relationship of Dpp receptors encoded by the saxophone and thick veins genes in *Drosophila*. *Cell* **78**, 251–61.
- Brummel, T., Abdollah, S., Haerry, T. E., Shimell, M. J., Merriam, J., Raftery, L., Wrana, J. L. and O'Connor, M. B.** (1999). The *Drosophila* Activin receptor Baboon signals through dSmad2 and controls cell proliferation but not patterning during larval development. *Genes Dev.* **13**, 98–111.
- Campbell, G. and Tomlinson, a** (1999). Transducing the Dpp morphogen gradient in the wing of *Drosophila*: regulation of Dpp targets by brinker. *Cell* **96**, 553–62.
- Childs, S. R., Wrana, J. L., Arora, K., Attisano, L., O'Connor, M. B. and Massagué, J.** (1993). Identification of a *Drosophila* activin receptor. *Proc. Natl. Acad. Sci. U. S. A.* **90**, 9475–9.
- Chng, W. A., Sleiman, M. S. B., Schüpfer, F. and Lemaitre, B.** (2014). Transforming growth factor  $\beta$ /activin signaling functions as a sugar-sensing feedback loop to regulate digestive enzyme expression. *Cell Rep.* **9**, 336–348.
- De Santis, C., Wade, N. M., Jerry, D. R., Preston, N. P., Glencross, B. D. and Sellars, M. J.** (2011). Growing backwards: an inverted role for the shrimp ortholog of vertebrate myostatin and GDF11. *J. Exp. Biol.* **214**, 2671–2677.
- Demontis, F., Patel, V. K., Swindell, W. R. and Perrimon, N.** (2014). Intertissue control of the nucleolus via a myokine-dependent longevity pathway. *Cell Rep.* **7**, 1481–1494.
- Di Cara, F. and King-Jones, K.** (2016). The Circadian Clock Is a Key Driver of Steroid Hormone Production in *Drosophila*. *Curr. Biol.* **26**, 2469–2477.
- Droujinine, I. A. and Perrimon, N.** (2013). Defining the interorgan communication network: systemic coordination of organismal cellular processes under homeostasis and localized stress. *Front. Cell. Infect. Microbiol.* **3**, 82.
- Dutta, D., Anant, S., Ruiz-Gomez, M., Bate, M. and VijayRaghavan, K.** (2004). Founder myoblasts and fibre number during adult myogenesis in *Drosophila*. *Development* **131**, 3761–3772.
- Egerman, M. A., Cadena, S. M., Gilbert, J. A., Meyer, A., Nelson, H. N., Swalley, S. E., Mallozzi, C., Jacobi, C., Jennings, L. L., Clay, I., et al.** (2015). GDF11 Increases with Age and Inhibits Skeletal Muscle Regeneration. *Cell Metab.* **22**, 164–74.
- El-Brolosy, M. A. and Stainier, D. Y. R.** (2017). Genetic compensation: A phenomenon in search of mechanisms. *PLoS Genet.* **13**, e1006780.

- El-Brolosy, M. A., Kontarakis, Z., Rossi, A., Kuenne, C., Günther, S., Fukuda, N., Kikhi, K., Boezio, G. L. M., Takacs, C. M., Lai, S.-L., et al.** (2019). Genetic compensation triggered by mutant mRNA degradation. *Nature* **568**, 193–197.
- Fuentes-Medel, Y., Ashley, J., Barria, R., Maloney, R., Freeman, M. and Budnik, V.** (2012). Integration of a retrograde signal during synapse formation by glia-secreted TGF-beta ligand. *Curr Biol* **22**, 1831–1838.
- Ghosh, A. C. and O'Connor, M. B.** (2014). Systemic Activin signaling independently regulates sugar homeostasis, cellular metabolism, and pH balance in *Drosophila melanogaster*. *Proc. Natl. Acad. Sci. U. S. A.* **111**, 5729–34.
- Gibbens, Y. Y., Warren, J. T., Gilbert, L. I. and O'Connor, M. B.** (2011). Neuroendocrine regulation of *Drosophila* metamorphosis requires TGFbeta/Activin signaling. *Development* **138**, 2693–703.
- Graveley, B. R., Brooks, A. N., Carlson, J. W., Duff, M. O., Landolin, J. M., Yang, L., Artieri, C. G., van Baren, M. J., Boley, N., Booth, B. W., et al.** (2011). The developmental transcriptome of *Drosophila melanogaster*. *Nature* **471**, 473–9.
- Grewal, S. S.** (2012). Controlling animal growth and body size - does fruit fly physiology point the way? *F1000 Biol. Rep.* **4**, 12.
- Grobet, L., Martin, L. J., Poncelet, D., Pirottin, D., Brouwers, B., Riquet, J., Schoeberlein, A., Dunner, S., Ménissier, F., Massabanda, J., et al.** (1997). A deletion in the bovine myostatin gene causes the double-muscling phenotype in cattle. *Nat. Genet.* **17**, 71–4.
- Gunage, R. D., Reichert, H. and VijayRaghavan, K.** (2014). Identification of a new stem cell population that generates *Drosophila* flight muscles. *Elife* **3**,.
- Haerry, T. E., Khalsa, O., O'Connor, M. B. and Wharton, K. a** (1998). Synergistic signaling by two BMP ligands through the SAX and TKV receptors controls wing growth and patterning in *Drosophila*. *Development* **125**, 3977–87.
- Hariharan, I. K.** (2015). Organ Size Control: Lessons from *Drosophila*. *Dev. Cell* **34**, 255–65.
- Heldin, C.-H. and Moustakas, A.** (2016). Signaling Receptors for TGF-β Family Members. *Cold Spring Harb. Perspect. Biol.* **8**,.
- Hevia, C. F. and de Celis, J. F.** (2013). Activation and function of TGFβ signalling during *Drosophila* wing development and its interactions with the BMP pathway. *Dev. Biol.* **377**, 138–53.
- Hevia, C. F., López-Varea, A., Esteban, N. and de Celis, J. F.** (2017). A Search for Genes Mediating the Growth Promoting Function of TGFβ in the *Drosophila melanogaster* Wing Disc. *Genetics* **206**, genetics.116.197228.
- Hinck, A. P., Mueller, T. D. and Springer, T. A.** (2016). Structural Biology and Evolution of the TGF-β Family. *Cold Spring Harb. Perspect. Biol.* **8**,.
- Jaszczak, J. S. and Halme, A.** (2016). Arrested development: coordinating regeneration with development and growth in *Drosophila melanogaster*. *Curr. Opin. Genet. Dev.* **40**, 87–94.
- Jensen, P. A., Zheng, X., Lee, T. and O'Connor, M. B.** (2009). The *Drosophila* Activin-like ligand Dawdle signals preferentially through one isoform of the Type-I receptor Baboon. *Mech. Dev.* **126**,

950–7.

- Johnston, L. A. and Gallant, P.** (2002). Control of growth and organ size in *Drosophila*. *Bioessays* **24**, 54–64.
- Kalidas, S. and Smith, D. P.** (2002). Novel genomic cDNA hybrids produce effective RNA interference in adult *Drosophila*. *Neuron* **33**, 177–84.
- Jaszczak, J. S. and Halme, A.** (2016). Arrested development: coordinating regeneration with development and growth in *Drosophila melanogaster*. *Curr. Opin. Genet. Dev.* **40**, 87–94.
- Kim, M.-J. and O'Connor, M. B.** (2020). *Drosophila* Activin signaling promotes muscle growth through InR/dTORC1 dependent and independent processes. *bioRxiv*.
- Lecuit, T., Brook, W., Ng, M., Calleja, M., Sun, H. and Cohen, S.** (1996). Two distinct mechanisms for long-range patterning by Decapentaplegic in the *Drosophila* wing. *Nature* **381**, 387–393.
- Lee-Hoeflich, S. T., Zhao, X., Mehra, A. and Attisano, L.** (2005). The *Drosophila* type II receptor, Wishful thinking, binds BMP and myoglianin to activate multiple TGF $\beta$  family signaling pathways. *FEBS Lett.* **579**, 4615–4621.
- Lee, J. Y., Hopkinson, N. S. and Kemp, P. R.** (2011). Myostatin induces autophagy in skeletal muscle in vitro. *Biochem. Biophys. Res. Commun.* **415**, 632–6.
- Letsou, A., Arora, K., Wrana, J. L., Simin, K., Twombly, V., Jamal, J., Staehling-Hampton, K., Hoffmann, F. M., Gelbart, W. M. and Massagué, J.** (1995). *Drosophila* Dpp signaling is mediated by the punt gene product: a dual ligand-binding type II receptor of the TGF  $\beta$  receptor family. *Cell* **80**, 899–908.
- Lo, P. C. and Frasch, M.** (1999). Sequence and expression of myoglianin, a novel *Drosophila* gene of the TGF- $\beta$  superfamily. *Mech. Dev.* **86**, 171–5.
- Marqués, G., Bao, H., Haerry, T. E., Shimell, M. J., Duchek, P., Zhang, B. and O'Connor, M. B.** (2002). The *Drosophila* BMP type II receptor Wishful Thinking regulates neuromuscular synapse morphology and function. *Neuron* **33**, 529–43.
- Martin, F. A., Herrera, S. C. and Morata, G.** (2009). Cell competition, growth and size control in the *Drosophila* wing imaginal disc. *Development* **136**, 3747–3756.
- McPherron, A. C. and Lee, S. J.** (1997). Double muscling in cattle due to mutations in the myostatin gene. *Proc. Natl. Acad. Sci. U. S. A.* **94**, 12457–61.
- McPherron, A. C., Huynh, T. V and Lee, S.-J.** (2009). Redundancy of myostatin and growth/differentiation factor 11 function. *BMC Dev. Biol.* **9**, 24.
- Minami, M., Kinoshita, N., Kamoshida, Y., Tanimoto, H. and Tabata, T.** (1999). brinker is a target of Dpp in *Drosophila* that negatively regulates Dpp-dependent genes. *Nature* **398**, 242–6.
- Mirth, C. K. and Shingleton, A. W.** (2012). Integrating body and organ size in *Drosophila*: Recent advances and outstanding problems. *Front. Endocrinol. (Lausanne)*. **3**, 1–13.
- Morikawa, M., Derynck, R. and Miyazono, K.** (2016). TGF- $\beta$  and the TGF- $\beta$  Family: Context-Dependent Roles in Cell and Tissue Physiology. *Cold Spring Harb. Perspect. Biol.* **8**, a021873.
- Moss-Taylor, L., Upadhyay, A., Pan, X., Kim, M.-J. and O'Connor, M. B.** (2019). Motoneuron-derived Activin $\beta$  regulates *Drosophila* body size and tissue-scaling during larval growth and adult

development. *bioRxiv* 661363.

- Müller, B., Hartmann, B., Pyrowolakis, G., Affolter, M. and Basler, K.** (2003). Conversion of an extracellular Dpp/BMP morphogen gradient into an inverse transcriptional gradient. *Cell* **113**, 221–33.
- Nijhout, H. F.** (2003). The control of body size in insects. *Dev. Biol.* **261**, 1–9.
- Parker, L., Ellis, J. E., Nguyen, M. Q. and Arora, K.** (2006). The divergent TGF- $\beta$  ligand Dawdle utilizes an activin pathway to influence axon guidance in *Drosophila*. *Development* **133**, 4981–4991.
- Peterson, A. J. and O'Connor, M. B.** (2013). Activin receptor inhibition by Smad2 regulates *Drosophila* wing disc patterning through BMP-response elements. *Development* **140**, 649–59.
- Peterson, A. J. and O'Connor, M. B.** (2014). Strategies for exploring TGF- $\beta$  signaling in *Drosophila*. *Methods* **68**, 183–93.
- Peterson, A. J., Jensen, P. A., Shimell, M., Stefancsik, R., Wijayatunge, R., Herder, R., Raftery, L. A. and O'Connor, M. B.** (2012). R-Smad competition controls activin receptor output in *Drosophila*. *PLoS One* **7**, e36548.
- Restrepo, S., Zartman, J. J. and Basler, K.** (2014). Coordination of patterning and growth by the morphogen DPP. *Curr. Biol.* **24**, R245–R255.
- Rodriguez, J., Vernus, B., Chelh, I., Cassar-Malek, I., Gabillard, J. C., Hadj Sassi, A., Seiliez, I., Picard, B. and Bonnieu, A.** (2014). Myostatin and the skeletal muscle atrophy and hypertrophy signaling pathways. *Cell. Mol. Life Sci.* **71**, 4361–71.
- Romero-Pozuelo, J., Demetriades, C., Schroeder, P. and Teleman, A. A.** (2017). CycD/Cdk4 and Discontinuities in Dpp Signaling Activate TORC1 in the *Drosophila* Wing Disc. *Dev. Cell* **42**, 376–387.e5.
- Sander, V., Eivers, E., Choi, R. H. and De Robertis, E. M.** (2010). *Drosophila* Smad2 opposes Mad signaling during wing vein development. *PLoS One* **5**, e10383.
- Serpe, M. and O'Connor, M. B.** (2006). The metalloprotease tolloid-related and its TGF-beta-like substrate Dawdle regulate *Drosophila* motoneuron axon guidance. *Development* **133**, 4969–79.
- Setiawan, L., Pan, X., Woods, A. L., O'Connor, M. B. and Hariharan, I. K.** (2018). The BMP2/4 ortholog Dpp can function as an inter-organ signal that regulates developmental timing. *Life Sci. alliance* **1**, e201800216.
- Shimmi, O. and O'Connor, M. B.** (2003). Physical properties of Tld, Sog, Tsg and Dpp protein interactions are predicted to help create a sharp boundary in Bmp signals during dorsoventral patterning of the *Drosophila* embryo. *Development* **130**, 4673–82.
- Shingleton, A. W., Frankino, W. A., Flatt, T., Nijhout, H. F. and Emlen, D. J.** (2007). Size and shape: the developmental regulation of static allometry in insects. *Bioessays* **29**, 536–48.
- Shingleton, A. W., Mirth, C. K. and Bates, P. W.** (2008). Developmental model of static allometry in holometabolous insects. *Proc. R. Soc. B Biol. Sci.* **275**, 1875–1885.
- Sinha, M., Jang, Y. C., Oh, J., Khong, D., Wu, E. Y., Manohar, R., Miller, C., Regalado, S. G., Loffredo, F. S., Pancoast, J. R., et al.** (2014). Restoring Systemic GDF11 Levels Reverses Age-Related Dysfunction in Mouse Skeletal Muscle. *Science (80-. )*. **344**, 649–652.
- Song, W., Owusu-Ansah, E., Hu, Y., Cheng, D., Ni, X., Zirin, J. and Perrimon, N.** (2017). Activin

- signaling mediates muscle-to-adipose communication in a mitochondria dysfunction-associated obesity model. *Proc. Natl. Acad. Sci.* **114**, 8596–8601.
- Sopko, R. and Perrimon, N.** (2013). Receptor Tyrosine Kinases in Drosophila Development. *Cold Spring Harb. Perspect. Biol.* **5**, a009050–a009050.
- Teleman, A. A.** (2009). Molecular mechanisms of metabolic regulation by insulin in Drosophila. *Biochem. J.* **425**, 13–26.
- Ting, C.-Y., Herman, T., Yonekura, S., Gao, S., Wang, J., Serpe, M., O'Connor, M. B., Zipursky, S. L. and Lee, C.-H.** (2007). Tiling of r7 axons in the Drosophila visual system is mediated both by transduction of an activin signal to the nucleus and by mutual repulsion. *Neuron* **56**, 793–806.
- Trendelenburg, A. U., Meyer, A., Rohner, D., Boyle, J., Hatakeyama, S. and Glass, D. J.** (2009). Myostatin reduces Akt/TORC1/p70S6K signaling, inhibiting myoblast differentiation and myotube size. *Am. J. Physiol. Cell Physiol.* **296**, C1258–70.
- Uhlén, M., Fagerberg, L., Hallström, B. M., Lindskog, C., Oksvold, P., Mardinoglu, A., Sivertsson, Å., Kampf, C., Sjöstedt, E., Asplund, A., et al.** (2015). Tissue-based map of the human proteome. *Science (80-. )*. **347**, 1260419.
- Upadhyay, A., Moss-Taylor, L., Kim, M., Ghosh, A. C. and O'Connor, M. B.** (2017). TGF- $\beta$  Family Signaling in Drosophila. *Cold Spring Harb. Perspect. Biol.* **9**,.
- Van Bortle, K., Peterson, A. J., Takenaka, N., O'Connor, M. B. and Corces, V. G.** (2015). CTCF-dependent co-localization of canonical Smad signaling factors at architectural protein binding sites in *D. melanogaster*. *Cell Cycle* **14**, 2677–87.
- Wartlick, O., Mumcu, P., Kicheva, a, Bittig, T., Seum, C., Jülicher, F. and González-Gaitán, M.** (2011). Dynamics of Dpp signaling and proliferation control. *Science* **331**, 1154–1159.
- Wolfman, N. M., McPherron, A. C., Pappano, W. N., Davies, M. V, Song, K., Tomkinson, K. N., Wright, J. F., Zhao, L., Sebald, S. M., Greenspan, D. S., et al.** (2003). Activation of latent myostatin by the BMP-1/tolloid family of metalloproteinases. *Proc. Natl. Acad. Sci. U. S. A.* **100**, 15842–6.
- Yu, X. M., Gutman, I., Mosca, T. J., Iram, T., Ozkan, E., Garcia, K. C., Luo, L. and Schuldiner, O.** (2013). Plum, an immunoglobulin superfamily protein, regulates axon pruning by facilitating TGF- $\beta$  signaling. *Neuron* **78**, 456–68.
- Zheng, X., Zugates, C. T., Lu, Z., Shi, L., Bai, J. and Lee, T.** (2006). Baboon/dSmad2 TGF-beta signaling is required during late larval stage for development of adult-specific neurons. *EMBO J.* **25**, 615–27.
- Zhu, C. C., Boone, J. Q., Jensen, P. A., Hanna, S., Podemski, L., Locke, J., Doe, C. Q. and O'Connor, M. B.** (2008). Drosophila Activin- and the Activin-like product Dawdle function redundantly to regulate proliferation in the larval brain. *Development* **135**, 513–521.

Figure 1

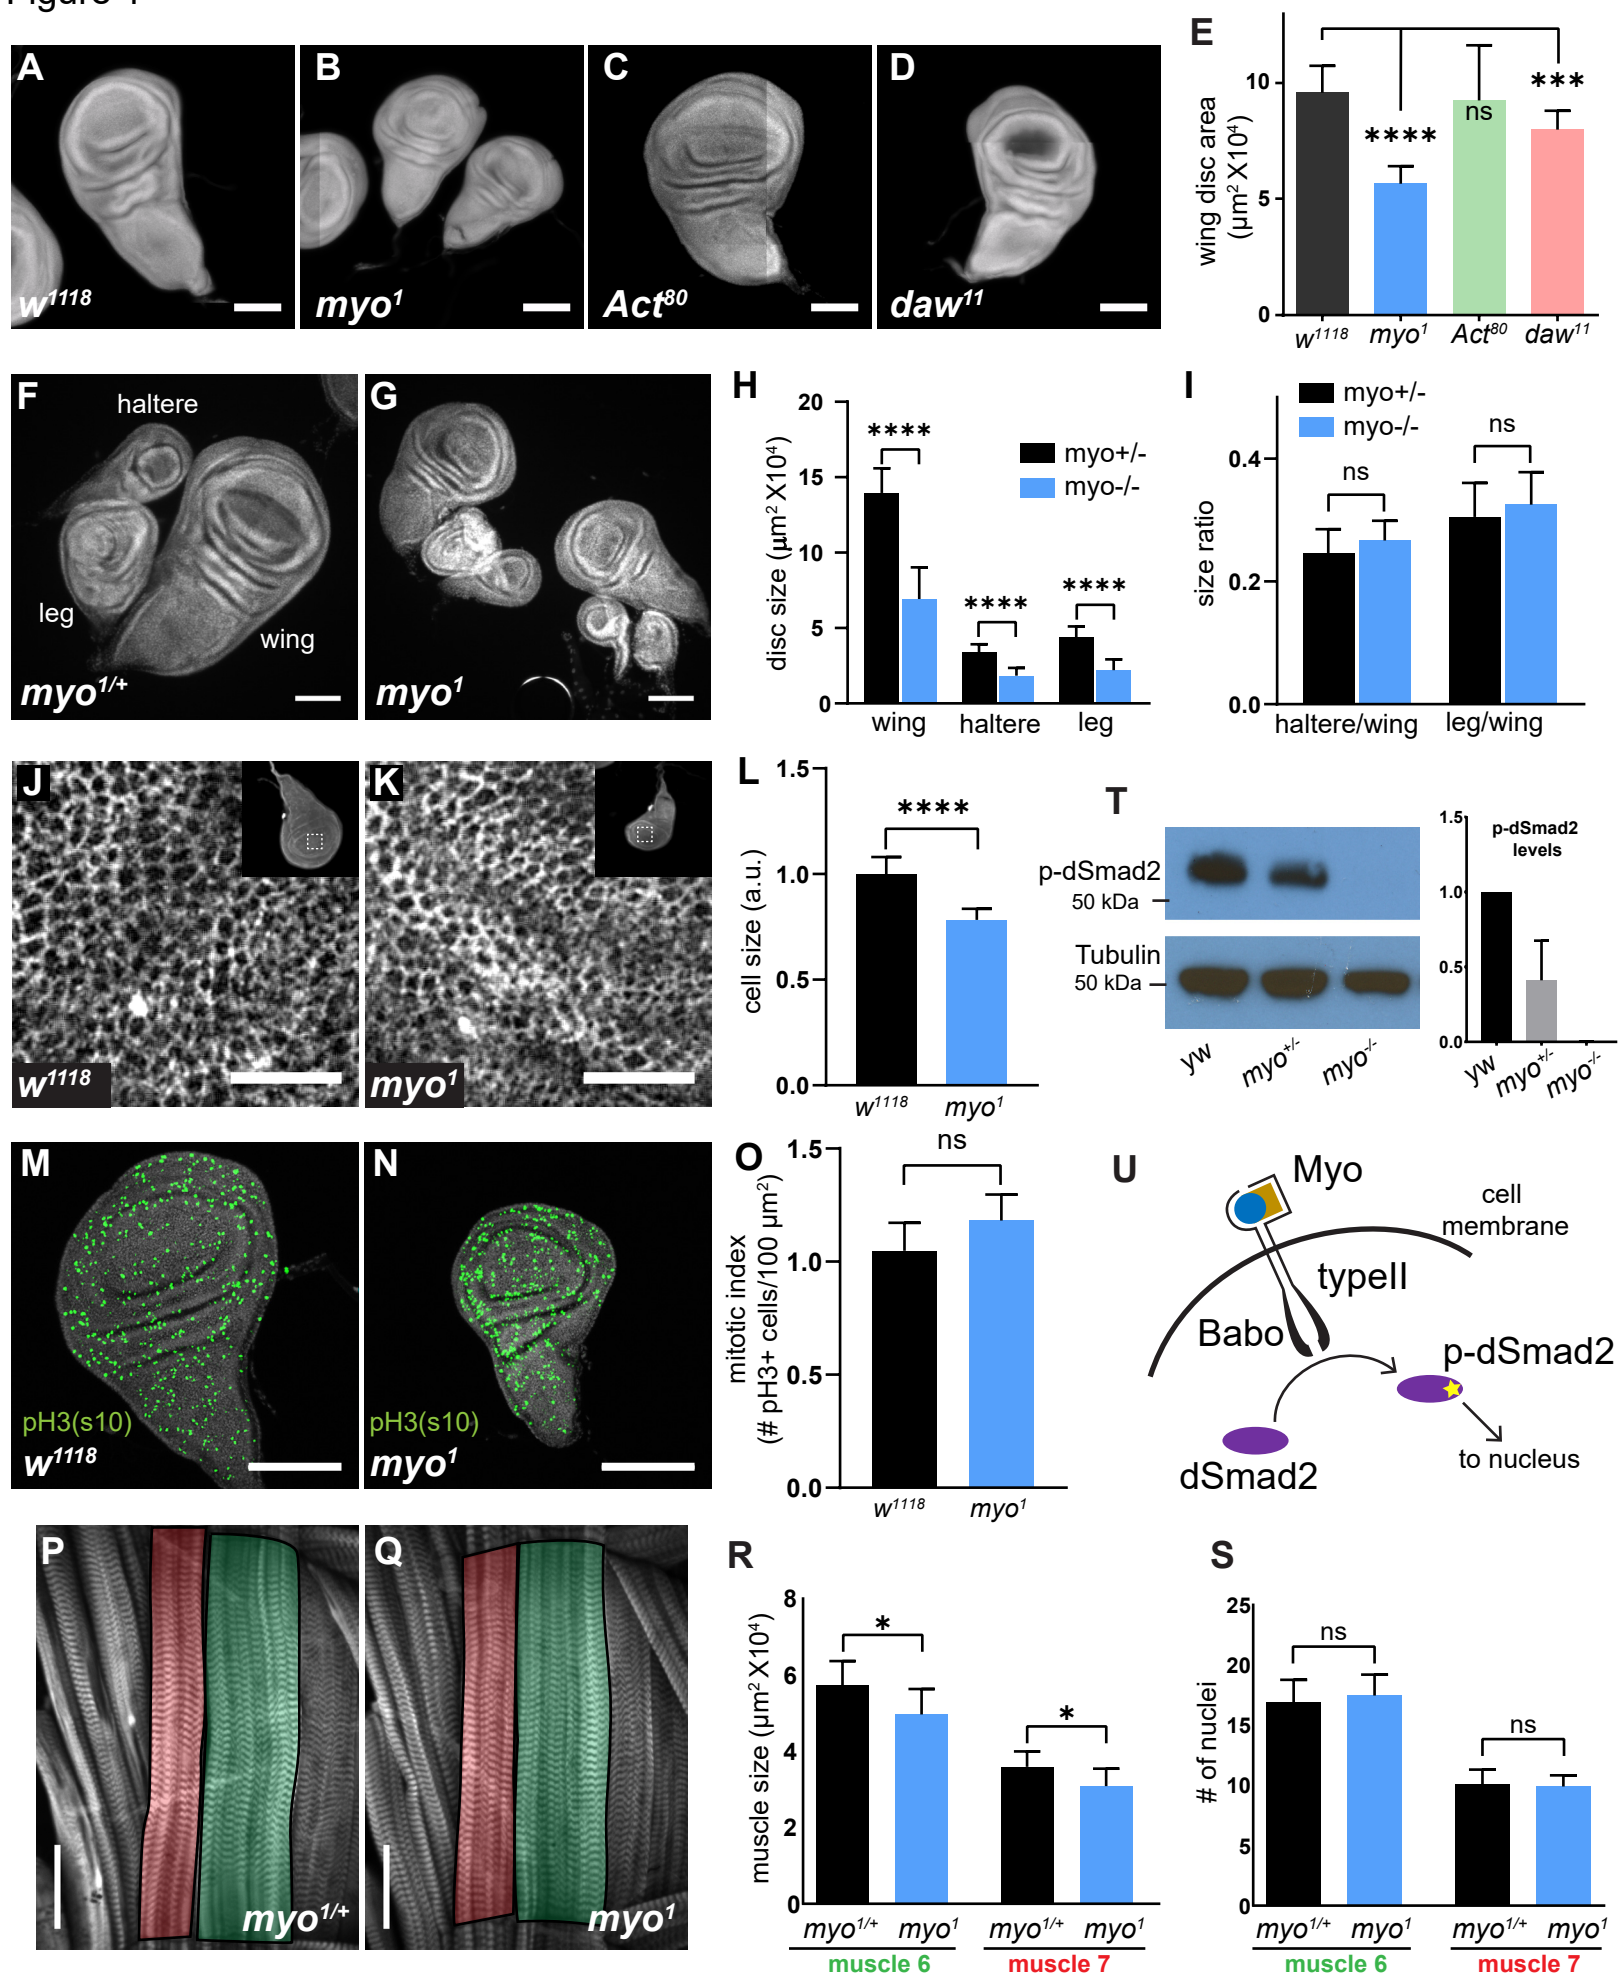

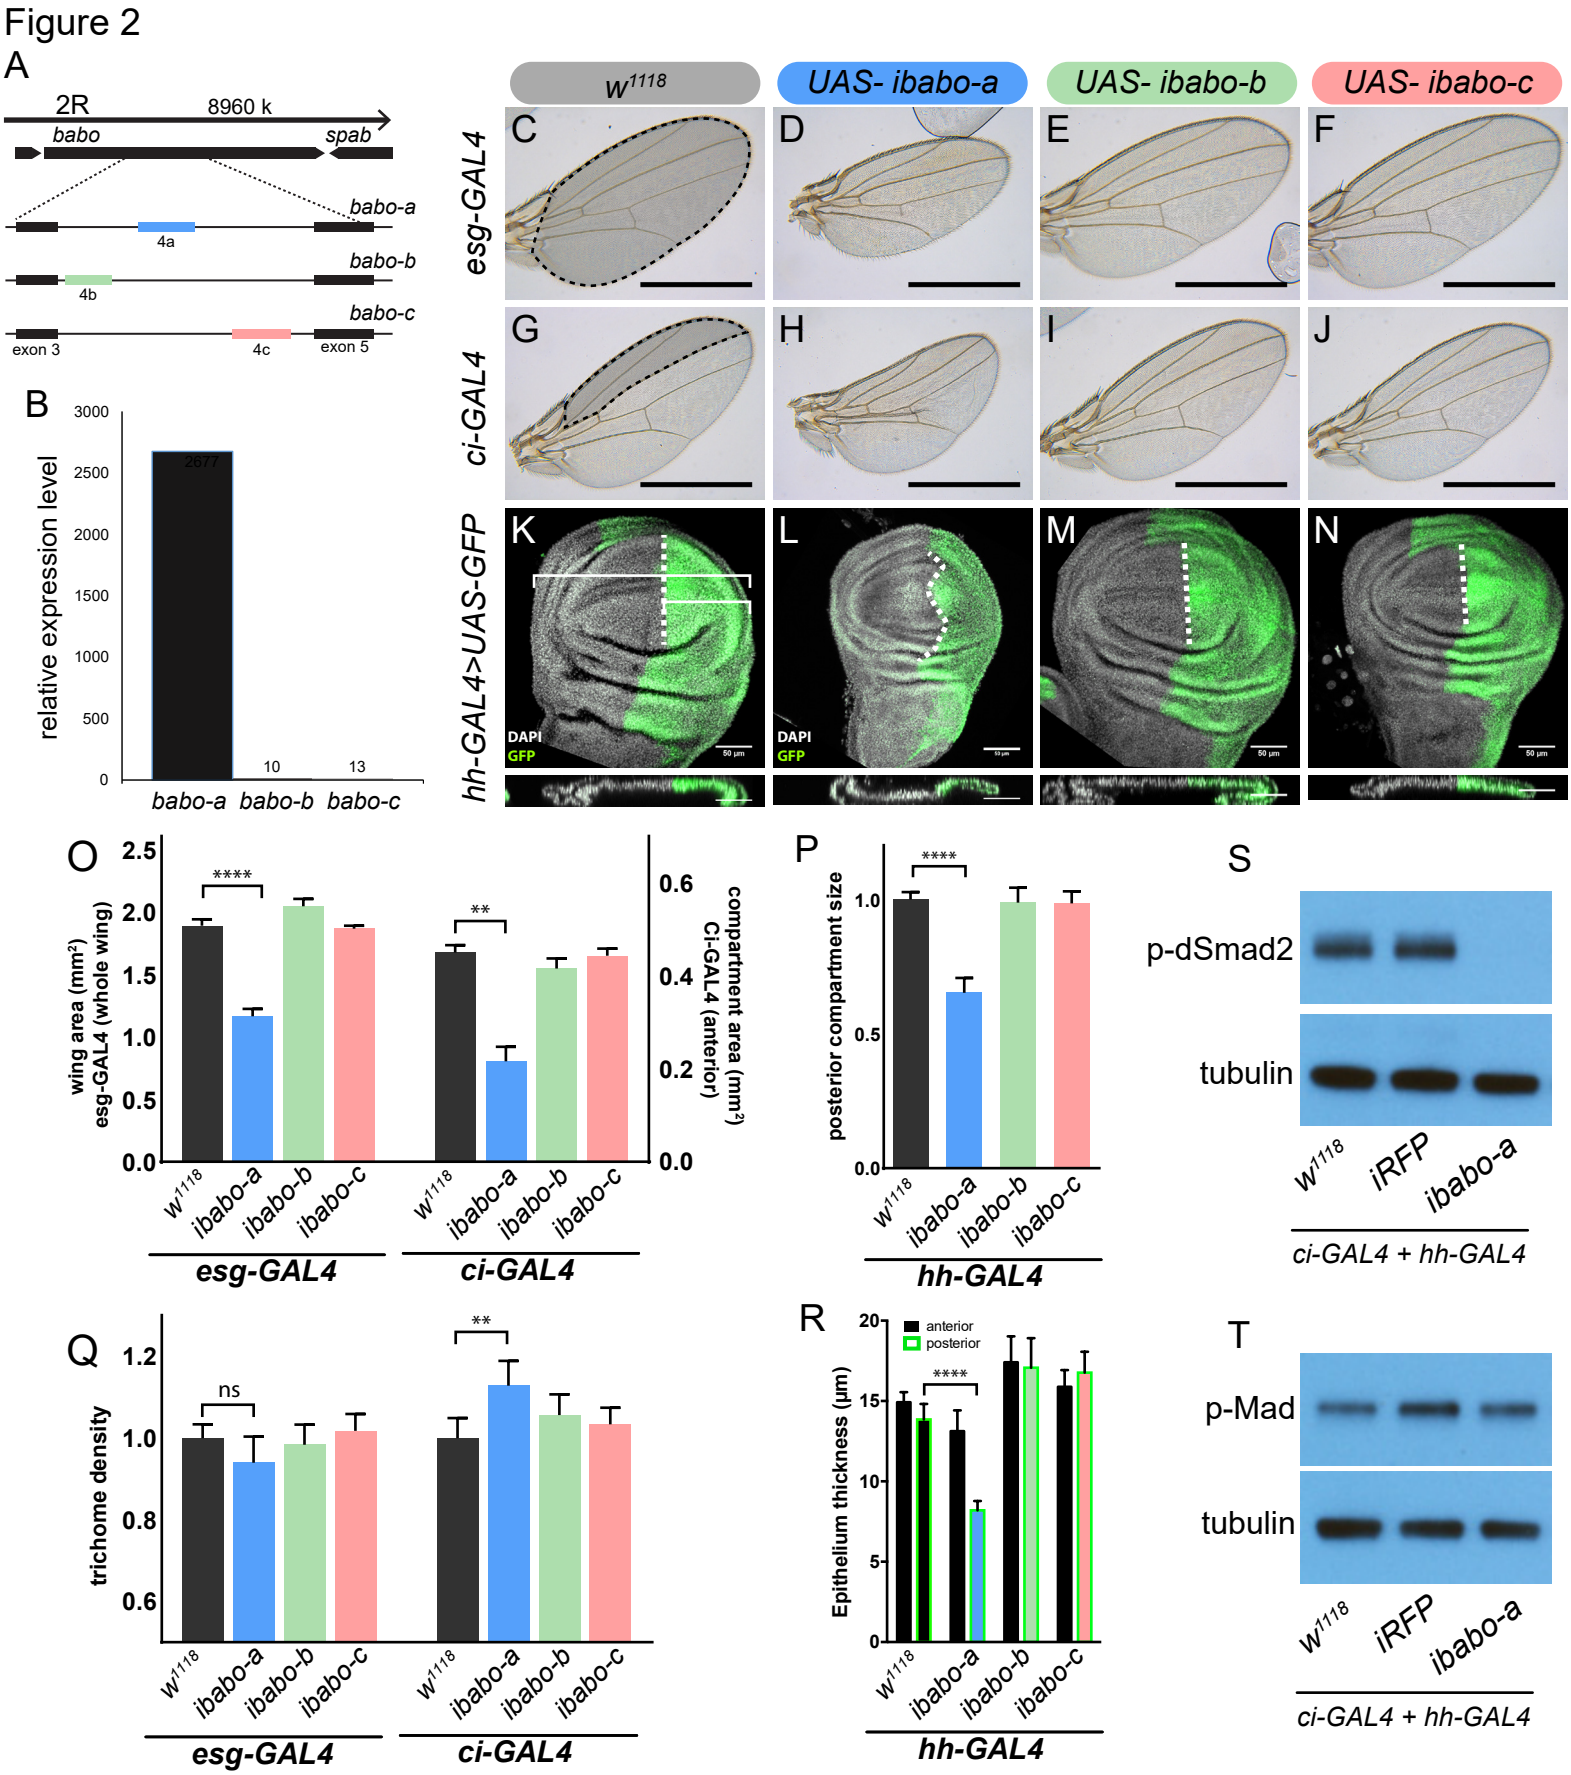

**Figure 3**

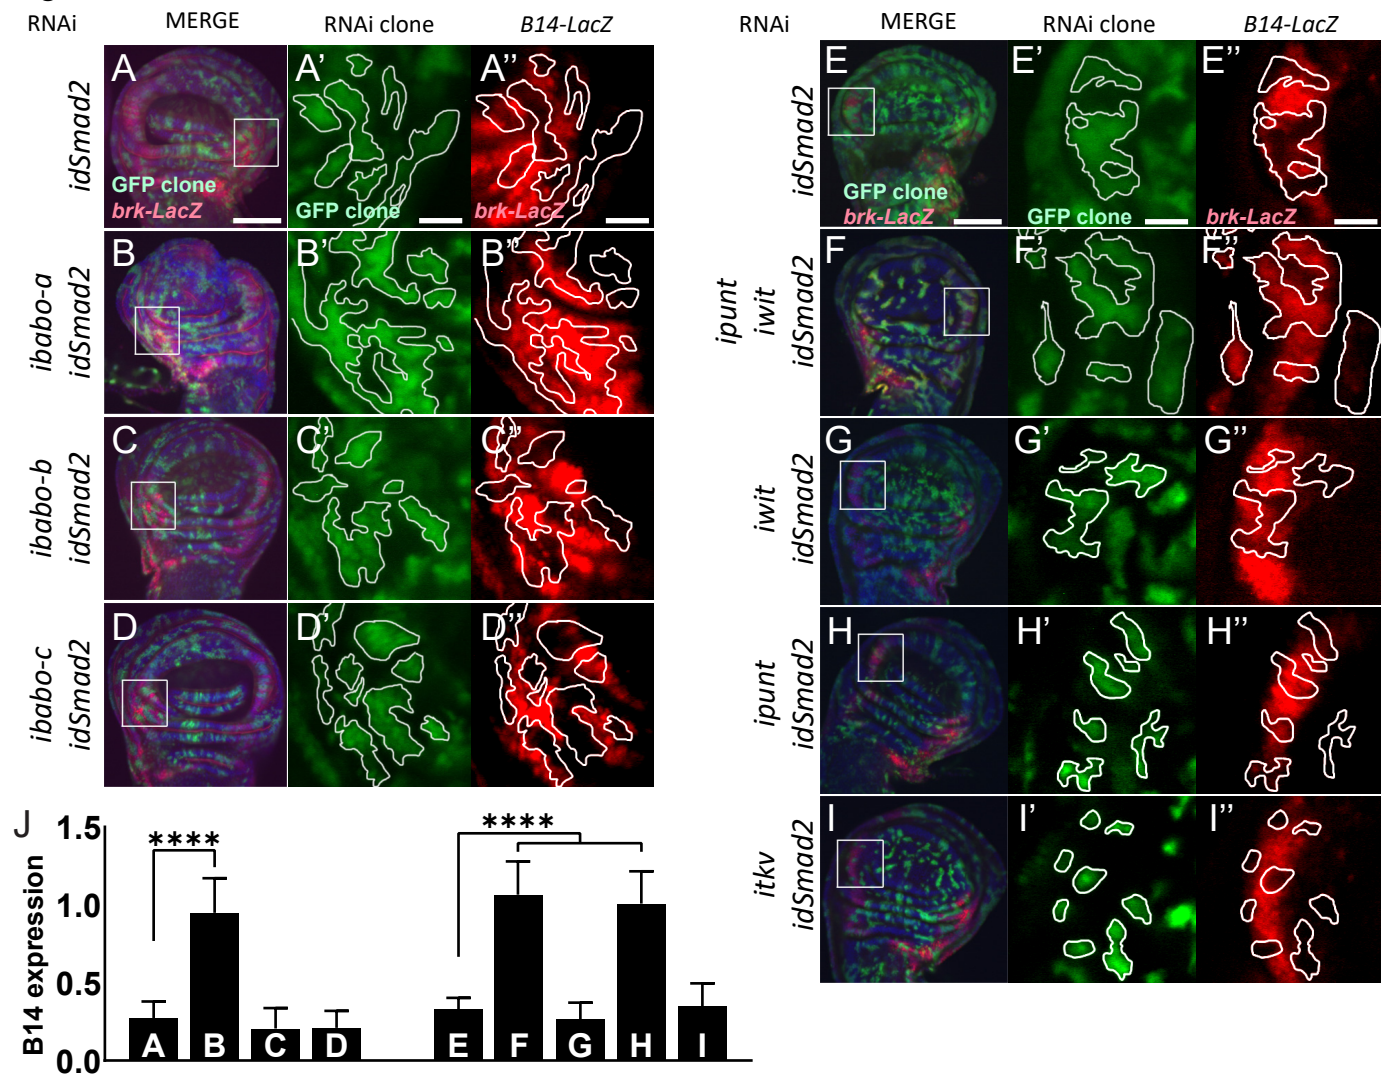

Figure 4

*myo* > *CD8-GFP*

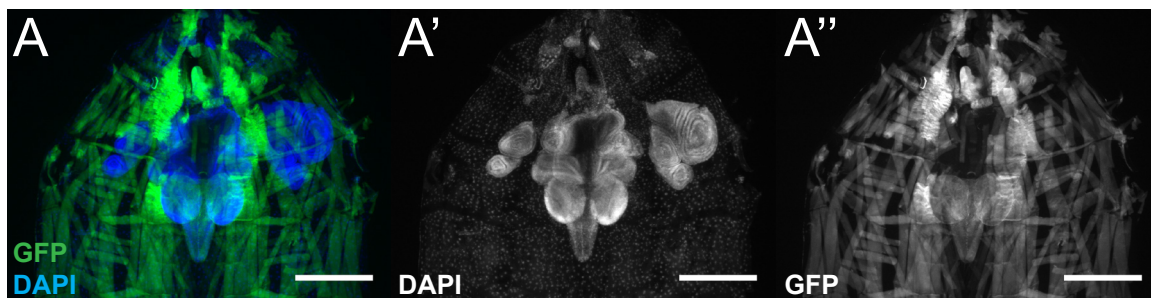

*myo* > *NLS-GFP*

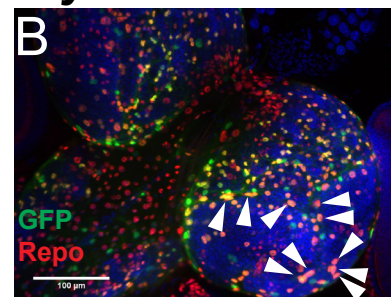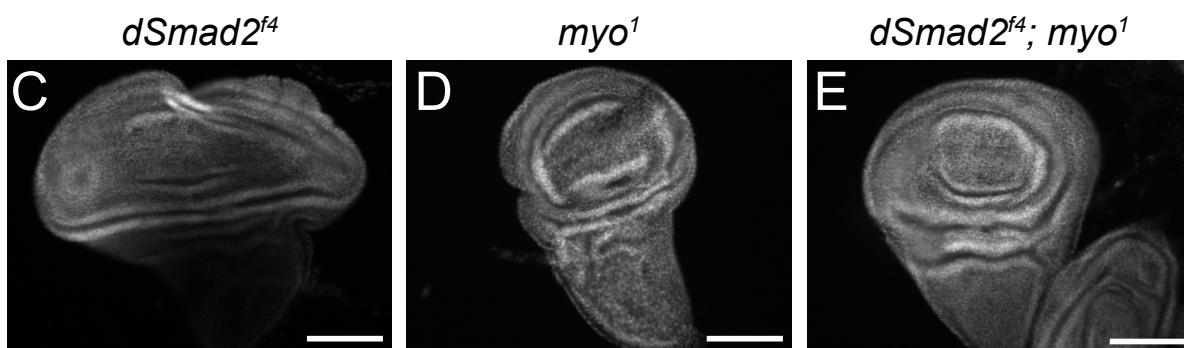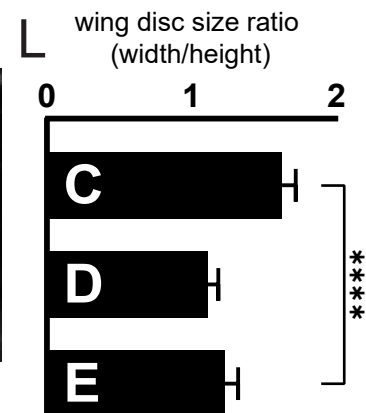

*dSmad2<sup>f4</sup>; UAS-dicer2, UAS-imy*

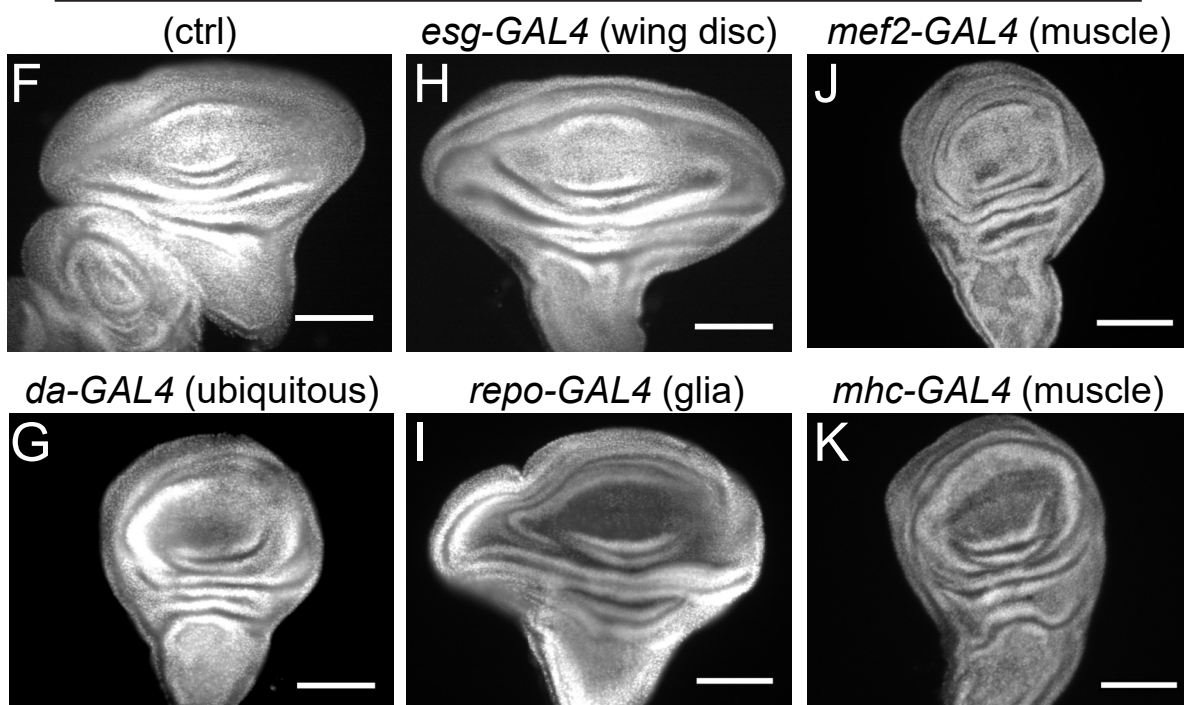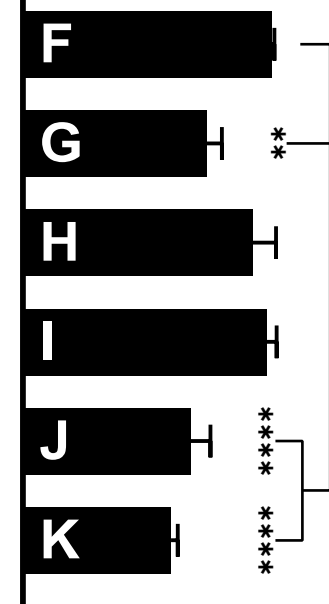

Figure 5

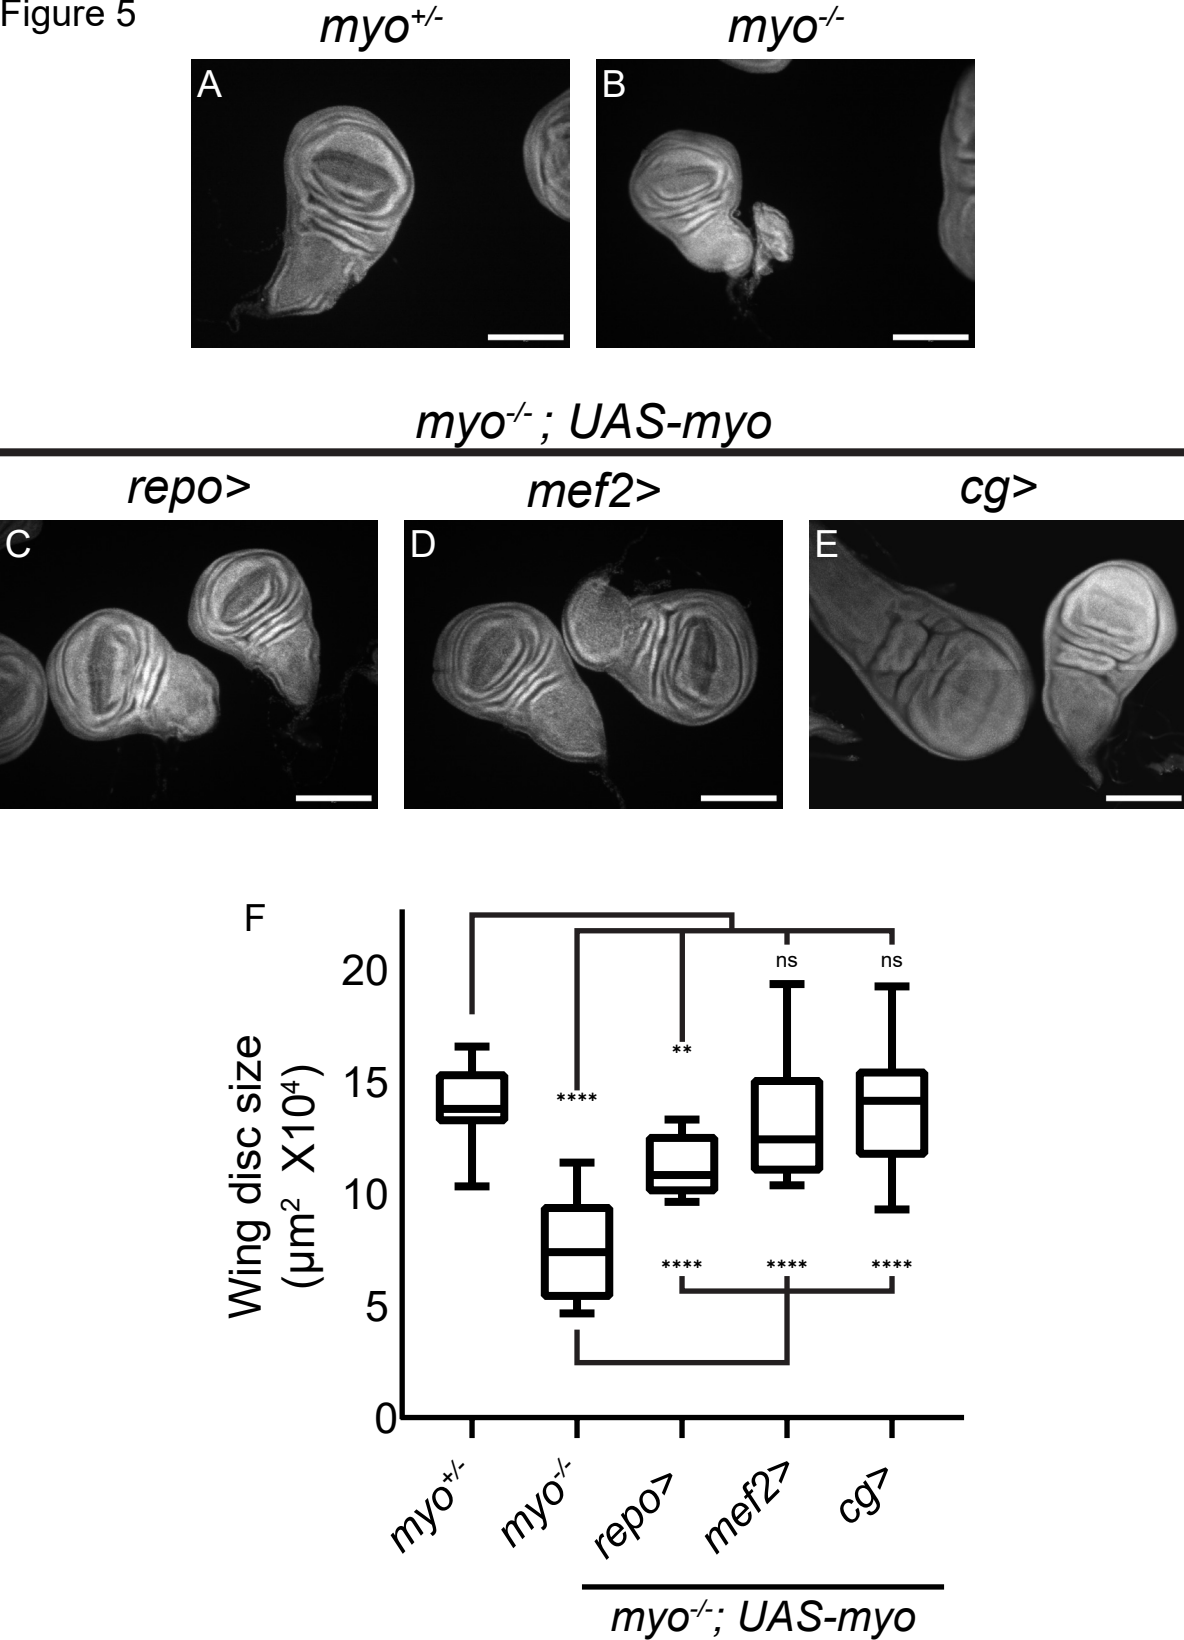

Source: http://biorxiv.org/content/10.1101/793851v2.full.pdf
